# Supplementary material for: Domestication Gene Mlx and Its Partner Mondo Are Involved in Controlling the Larval Body Size and Cocoon Shell Weight of Bombyx mori
Source: MDPI journal article supplement (doi:10.3390/ijms25063427), 2024-03-18
Supplement: s1 [file s1]

>Bm1

TGAAGTCGTCGTGGCCTAAAGGATAAGACGTCCGGTGCATTTCGTATCGAGCGATGCAC  
TGGTGTTCGAATCTCGCTGGCGGGCACCAATTTTTCTAATGAAATACGTACCCAACAAA  
TGTTACGATTGGCCTCCACGATGAAGGAATAACATCGTGCAATATAAATCAAACCCGC  
AAAATTATAATTTGCGTAATCACTGGTGGTAGGACCTCTTGTGAGTCCGCACGGGTAGG  
TACCACCGCCCCGCCTATTTCTGCCGTGAAGCAGTAATGCGTTTCGGTTTGAAGGGTGG  
GGCAGCCGTTGTGACTATACTGAGACCTTAGAACTATATCTCAAGGTGTGTGGCGCATT  
TACGTTGTAGATGTCTATGGGCTCCAGTAACCACTTAACACCAGGTGGGCTGTGAGCTC  
GTCCACATATCTAAGCAATAAAAAAAAAAAAAAAAAAAAAAATTT

**Figure S1.** The sequence of retrotransposon Bm1.

>DS1

TAAGCCCTTTCTAGGACACCCTTTATAATATATAATAATAAATAAATAAATATAACTAGCA  
CTACTACAACATTAATTTATGCATAATTTTGAAGATTTTATAAGCTTGATTAAATTAAAAT  
TACTCATATGTGTATTTTCTGTTGCTTGCAGAACTGGCATCATGAGCAGTCGATTGCCAT  
ATTGAAAAAAGAAAAATGTTGACGTTGACAGTCATCTGTGCTGTGACATAAATATTTTAA  
ACGTTGACTTTTTGGCGGGAATGCGAGGAGTGAAGTTGTGTGATTGATTCATTTTGTC  
TATTTAGTGTTTCTTAAGATTTAAATGTGTAATAACGGTGGTTTATTAAGTGTCAATATC  
TATGAAAGTGCACAAATGTGGGAAAACGAAACAAAGCCGCCGGACGCAACTTCTCGA  
GATCCTCCAAAATGTCCACTGAAAAAATCTCAGTAAATGACCACCATTTTACTGAGATT  
ATATTTCAACCCATATCATCTTATTTTATTTTCAATTCATCCCAGTTGATTAACGTCTCAAT  
TAATCATCTTAATTTCAATTCCTCCATATTATCATTTTTCATAAAAATAAGAATATAAAGT  
AAAGTAAGACATGACCTAAAGGTCTTAGTTACCAGGTCATAAAATCCCTTAAAAAATA  
ATTTTAAACGTAATTCTCGTACCTACCTATGTAGGTACTTATGTACGTAATTGTACCAA  
AGTCGGAATAATACTGTATTTTAGTTATCAGTAATTTGAAATTTGATTTTAGTATTACGT  
TACGTAAATGTTACGTAACCACATGGTTCAAAAGTGATTTAATTCGGGTCATGAAGTAC  
TTGTCCAAGACTATCTTATATTATAATGTTATCAATGTATTCTTCATACCCTACATAGAAA  
TAATGGAACAAGGCACCATGAACTCCGAAAAGTGAAAGATCGCATTAAATGTAATGTTTT  
ATTTTATTAAAGTTTCATTATAACAATTAATATCCCAAT

>DS2

TAAGCCCTTTCTAGGACACCCTTTATAATATATAATAATAAATAAATAAATATAACTAGCA  
CTACTACAACATTAATTTATGCATAATTTTGAAGATTTTATAAGCTTGATTAAATTAAAAT  
TACTCATATGTGTATTTTCTGTTGCTTGCAGAACTGGCATCATGAGCAGTCGATTGCCAT  
ATTGAAAAAAGAAAAATGTTGACGTTGACAGTCATCTGTGCTGTGACATAAATATTTTAA  
ACGTTGACTTTTTGGCGGGAATGCGAGGAGTGAAGTTGTGTGATTGATTCATTTTGTC  
TATTTAGTGTTTCTTAAGATTTAAATGTGTAATAACGGTGGTTTATTAAGTGTCAATATC  
TATGAAAGTGCACAAATGTGGGAAAACGAAACAAAGCCGCCGGACGCAACTTCTCGA  
GATCCTCCAAAATGTCCACTGAAAAAATCTCAGTAAATGACCACCATTTTACTGAGATT  
ATATTTCAACCCATATCATCTTATTTTATTTTCAATTCATCCCAGTTGATTAACGTCTCAAT  
TAATCATCTTAATTTCAATTCCTCCATATTATCATTTTTCATAAAAATAAGAATATAAAGT  
AAAGTAAGACATGACCTAAAGGTCTTAGTTACCAGGTCATAAAATCCCTTAAAAAATA  
ATTTTAAACGTAATTCTCGTACCTACCTATGTAGGTACTTATGTACGTAATTGTACCAA  
AGTCGGAATAATACTGTATTTTAGTTATCAGTAATTTGAAATTTGATTTTAGTATTACGT  
TACGTAAATGTTACGTAACCACATGGTTCAAAAGTGATTTAATTCGGGTCATGAAGTAC

TTGTCCAAGACTATCTTATATTTATAATGTTATCAATGTATTCTTCATACCCCTACATAGAAA  
TAATGGAACAAGGCACCATGAACTCCGAAAAGTGAAAGATCGCATTAAATGTAATGTTTT  
ATTTTATTAAAGTTTCATTATAACAATTAATATCCCAAT

>DS3

TAAGCCCTTTCTAGGACACCCTTTATAATATATAATAATAAAATAAAATATAACTAGCA  
CTACTACAACATTAATTTATGCATAATTTTGAAGATTTTATAAGCTTGATTAAATTAAAAT  
TACTCATATGTGTATTTTCTGTTGCTTGCAGAACTGGCATCATGAGCAGTCGATTGCCAT  
ATTGAAAAAAGAAAATGTTGACGTTGACAGTCATCTGTGCTGTGACATAAATATTTTAA  
ACGTTGACTTTTTGGCGGGAATGCGAGGAGTGAAGTTGTGTGATTGATTCATTTTGTC  
TATTTAGTGTTTCTTAAGATTAAATGTGTAATAACGGTGGTTTATTAAGTGTCAATATC  
TATGAAAGTGCACAAATGTGGGAAAACGAAACAAAGCCGCCGGACGCAACTTCTCGA  
GATCCTCCAAAATGTCCACTGAAAAAATCTCAGTAAATGACCACCATTTTACTGAGATT  
ATATTTCAACCCATATCATCTTATTTTATTTTATTTTATTTTATTTTATTTTATTTTATTTT  
TAATCATCTTAATTTTCAATTTTCACTCCATATTATCATTTTTTCATAAAAATAAGAATATAAAGT  
AAAGTAAGACATGACCTAAAGGTCTTAGTTACCAGGTCATAAAATCCCTTAAAAAATA  
ATTTTAAACGTAATTCTCGTACCTACCTATGTAGGTACTTATGTACGTAATTGTACCAA  
AGTCGGAAATAATACTGTATTTTAGTTATCAGTAATTTGAAATTTGATTTTAGTATTACGT  
TACGTAAATGTTACGTAACCACATGGTTCAAAAGTGATTTAATTCGGGTCATGAAGTAC  
TTGTCCAAGACTATCTTATATTTATAATGTTATCAATGTATTCTTCATACCCCTACATAGAAA  
TAATGGAACAAGGCACCATGAACTCCGAAAAGTGAAAGATCGCATTAAATGTAATGTTTT  
ATTTTATTAAAGTTTCATTATAACAATTAATATCCCAAT

>DS4

TAAGCCCTTTCTAGGACACCCTTTATAATATATAATAATAAAATAAAATATAACTAGCA  
CTACTACAACATTAATTTATGCATAATTTTGAAGATTTTATAAGCTTGATTAAATTAAAAT  
TACTCATATGTGTATTTTCTGTTGCTTGCAGAACTGGCATCATGAGCAGTCGATTGCCAT  
ATTGAAAAAAGAAAATGTTGACGTTGACAGTCATCTGTGCTGTGACATAAATATTTTAA  
ACGTTGACTTTTTGGCGGGAATGCGAGGAGTGAAGTTGTGTGATTGATTCATTTTGTC  
TATTTAGTGTTTCTTAAGATTAAATGTGTAATAACGGTGGTTTATTAAGTGTCAATATC  
TATGAAAGTGCACAAATGTGGGAAAACGAAACAAAGCCGCCGGACGCAACTTCTCGA  
GATCCTCCAAAATGTCCACTGAAAAAATCTCAGTAAATGACCACCATTTTACTGAGATT  
ATATTTCAACCCATATCATCTTATTTTATTTTATTTTATTTTATTTTATTTTATTTTATTTT  
TAATCATCTTAATTTTCAATTTTCACTCCATATTATCATTTTTTCATAAAAATAAGAATATAAAGT  
AAAGTAAGACATGACCTAAAGGTCTTAGTTACCAGGTCATAAAATCCCTTAAAAAATA  
ATTTTAAACGTAATTCTCGTACCTACCTATGTAGGTACTTATGTACGTAATTGTACCAA  
AGTCGGAAATAATACTGTATTTTAGTTATCAGTAATTTGAAATTTGATTTTAGTATTACGT  
TACGTAAATGTTACGTAACCACATGGTTCAAAAGTGATTTAATTCGGGTCATGAAGTAC  
TTGTCCAAGACTATCTTATATTTATAATGTTATCAATGTATTCTTCATACCCCTACATAGAAA  
TAATGGAACAAGGCACCATGAACTCCGAAAAGTGAAAGATCGCATTAAATGTAATGTTTT  
ATTTTATTAAAGTTTCATTATAACAATTAATATCCCAAT

>WS1-Short

TAAGCCCTTTCTAGGACACCCTTTATAAAATAAAATATAACTAGCACTACTACAACATTAA  
TATAAGCATACTTCTGAAGATTTTATAAGCTTGATTAAATTAAAATTACTTAAATTCATT  
TAATAAATGTGTATTTTCTGTTGCTTGCAGAACTGGCATCATGAGCAGTCGATTGCCATA  
TTGAAAAAAGAAAATGTTGACGTTGACAGTCATCTGTGCTGTGACATAAATATTATAAA

CGTTGACTTTTTGGCGGGAATGCGAGGAGTGAAGTTGTGTGATTTGATTCATTTTGTCT  
ATTTAGTGTTTCTTAAGATTTAAATGTGTAATAACGGTGGTTTATTAAGTGTAAATATCT  
ATGAAAGTGCACAAATGTGAGAAAACGAAACAAAGCCGCCGGACGCAACTTCACGG  
GATCCTCCAAAATGTCCACTGAAAAATCTCAGTAAATGACCACCATTTTACTGAGATT  
ATATTTCAACCCATATCATCTCATCTCATTTTATTTTCATTTTCATCCCAGTTGATTAACGTCT  
CAAATTAATCATCTTCATTTTCATTTCACTCCATATTATCATTTTCATAAAAAATAAGAACAT  
AAAGTAAAGTAAGACATGACCTAAAGGTCTTAGTTACCAGGTCATAAAATCCCTTAAA  
AAAATTATTTTAAACGTAATTCTCGTACCTACCTACGTAATATATGTAGGTACGTAATTGT  
ACCAAAAGTCGGAATAATACTGTTATTTTAGTTATCAGTAATTTGAAATTTGATTTTAG  
TATTACGTTACGTAAATGTTACGTAATCATATGGTTCAAAGTGATTTAATTCGGGGTCAT  
GAAGTACTTGTCCAAGACTATCTTATATTTATAATGTTATCAATGTATTCTTCATACCCTAC  
ATAGAAATAATGGAACAAGGCACCATGAACTCCGAAAAGTGAAAGATCGCATTAAATGT  
AATGTTTTATTCTATTAAAGTTTGATTATAACAATTAATATCCCAAT

>WS2-Short

TAAGCCCTTTCTAGGACACCCTTTATACTATATAATAATAAAATAAATAAATATAACTAGCA  
CTACTACAACATTAATTTATGCATACTTTTGAAGATTTTATAAGCTTGATTAAATTAAAAT  
TATTTATATGTGTATTTTCTGTTGCTTGCAGAACTGGCATCATGAGCAGTCGATTGCCATA  
TTGAAAAAAGAAAATGTTGACGTTGACAGTCATCTGTGCTGTGACATAAATATTTTAA  
CGTTGACTTTTTGGCGGGAATGCGAGGAGTGAAGTTGTGTGATTTGATTCATTTTGTCT  
ATTTAGTGTTTCTTAAGGTTTAAATGTGTAATAACGGTGGTTTATTAAGTGTCAATATCT  
ATGAAAGTGCACAAATGTGGGAAAACGAAACAAAGCCGCCGGACGCAACTTCTCGGG  
ATCCTCCAAAATGTCCACTGAAAAATCTCAGTAAATGACCACCATTTTACTGAGATTA  
TATTTCAACCCATATCATCTTATTTTATTTTCATTTTCATCCCAGTTGATTAACGTCTCAAATT  
AATCATCTTCATTTTCATTTCACTCCATATTATCATTTTTCATAAAAAATAAGAACATAAAGT  
AAAGTAAGACATGACCTAAAGGTCTTAGTTACCAGGTCATAAAATCCCTTAAAAAATA  
ATTTTAAACGTAATTCTCGTATATACCTACCTATGTAGGTACTTATGTACGTAATTGTACC  
AAAAGTCGGAATAATACTGTTATTTTAGTTATCAGTAATTTGAAATTTGATTTTAGTATT  
ACGTTACGTAAATGTTACGTAACCACATGGTTCAAAGTGATTTAATTCGGGGTCATGAA  
GTACTTGTCCAAGACTATCTTATATTTATAATGTTATCAATGTATTCTTCATACCCTACATA  
GAAATAATGTAACAAGGCACCATGAACTCCGAAAAGTGAAAGATCGCATTAAATGTAAT  
GTTTTATTTTATTAAAGTTTGATTATAACAATTAATATCCCAAT

>WS3-Short

TAAGCCCTTTCTAGGACACCCTTTATAAAATAAATATAACTATAACTACTACAACATTAAT  
TTATGCATACTTCTGAAGATTTTATAAGCTTGATTAAATTAAAATTACTTAAATTCTATTTA  
TTAAATGTGTATTTTCTGTTGCTTGCAGAACTGGCATCATGAGCAGTCGATTGCCATATT  
GAAAAAAGAAAATGTTGACGTTGACAGTCATCTGTGCTGTGGCATAAATATTATAAACG  
TTGACTTTTTGGCGGGAATGCGAGGAGTGAAGTTGTGTGATTTGATTCATTTTGTCTATT  
TAGTGTTTCTTAAGATTTAAATGTGTAATAACGGTGGTTTATTAAGTGTAAATATCTATG  
AAAGTGAACAAATGTGACGCAACTTCTCGGGATCCTCCAAAATGTTCACTGAAAAAT  
CTCAGTAAATGACCACCATTTTACTGAGATTATATTTCAACCCATATCATCCCATCTCATT  
TTATTTTCATTTTCATCCCAGTTGATCAACGTCTCAAATTAATCATCTTCATTTCACTCCATA  
TTATCATTTTTCATAAGAATAAGAACATAAAGTAAAGTAAGACATGACCTAAAGGTCTT  
AGTTACCAGGTCATAAAATCCCTTAAAAAATTATTTTAAACGTAATTCTCTTACCTACCT  
ACGTAATTTATGTAGGTACGTAATTGTACCAAAAGTCGGAATAATACTGTTATTTTAGT

TATCAGTAATTTGAAATTTGATTTTAGTATTACGTTACGTAAATGTTACGTAACCATATGG  
TTCAAAAGTGATTTAATTCGGGTCATGAAGTACTTGTCCAAGACTATCTTATATTTATAAT  
GTTATCAATGTATTCTTCATACCCTACATAGAAATAATGGAACAAGGCACCATGAACTCC  
GAAAAGTGAAAGATCGCATTAAATGTAATGTTTTATTTTATTAA  
GTTTCATTATAACAATTAATATCCCAAT

>WS4-Short

TAAGCCCTTTCTAGGACACCCCTTTATACTATATAATAATAAAATAAAATATAACTAGCA  
CTACTACAACATTAATTTATGCATACTTTTGAAGATTTTATAAGCTTGATTAAATTTAAAT  
TACTTATATGTGATTTTCTGTTGCTTGCAGAACTGGCATCATGAGCAGTCGATTGCCAT  
ATTGAAAAAAGAAAATGTTGACGTTGACAGTCATCTGTGCTGTGACATAAATATTTTAA  
ACGTTGACTTTTTGGCGGGAATGCGAGGAGTGAAGTTGTGTGATTGATTCATTTTGTC  
TATTTAGTGTTTCTTAAGGTTTAAATGTGTAATAACGGTGGTTTATTAAGTGTCAATATC  
TATGAAAGTGCACAAATGTGGGAAAACGAAACAAAGCCGCCGGACGCAACTTCTCGG  
GATCCTCCAAAATGTCCACTGAAAAATCTCAGTAAATGACCACCATTTTACTGAGATT  
ATATTTCAACCCATATCATCTTATTTTATTTTCAATTCATCCAGTTGATTAACTCTCAAT  
TAATCATCTTCATTTTCAATTCACCCCATATTATCATTTTCCATAAAAAATAAGAACATAAAG  
TAAAGTAAGACATGACCTAAAGGTCTTAGTTACCAGGTCATAAAATCCCTTAAAAAAT  
AATTTTAAACGTAATTCTCGTACCTACCTATGTAGGTACTTATGTACGTAATTGTACCAA  
AAGTCGGAAATAATACTGTTATTTTAGTTATCAGTAATTTGAAATTTGATTTTAGTATTAC  
GTTACGTAAATGTTACGTAACCACATGGTTCAAGAGTGATTTAATTCGGGTCATGAAGT  
ACTTGTTCAAGACTATCTTATATTTATAATGTTATCAATGTATTCTTCATACCCTACATAGA  
AATAATGGAACAAGGCACCATGAACTCCGAAAAGTGAAAGATCGCATTAAATGTAATGT  
TTTATTTTATTAAAGTTTCATTATAACAATTAATATCCCAAT

>WS1-Long

TAAGCCCTTTCTAGGACACCCCTTTATAATATATAATAATAAAATAAAATATAACTAGCA  
CTACTACAACATTAATTTATGCATACTTTTGAAGATTTTATAAGCTTGATTAAATTTAAAT  
TACTTAAATATGTATTTTCTGTTGCTTGCAGAACTGGCATCATGGGCAGTCGATTGCCAT  
ATTGAAAAAAGAAAATGTTGACGTTGACAGTCATCTGTGCTGTGACATAAATATTTTAA  
ACGTTGACTTTTTGGCGGGAATGCGAGGAGTGAAGTTGTGTGATTTTGAAGTCGTCGT  
GGCCTAAAGGATAAGACGTCCGGTGCATTTCGTATCGAGCGATGCACTGGTGTTTGAATC  
TCGCTGGCGGGCACCAATTTTCTAATGAAGTACGTACCCAACAAATGTTACGATTGG  
CCTCCACGATGAAGGAATAACATCGTGCAATATAAATCAAACCCGCAAAATTATAATTT  
GCGTAATCACTGGTGGTAGGACCTCTTGTGAGTCCGCACGGGTAGGTACCACCGCCCC  
GCCTATTTCTGCCGTGAAGCAGTAATGCGTTTTCGGTTTGAAGGGTGGGGCAGCCGTTG  
TGACTATACTGAGACCTTAGAACTATATCTCAAGGTGTGTGGCGCATTTACGTTGTAGAT  
GTCTATGGGCTCCAGTAACCACTTAACACCAGGTGGACTGTGAGCTCGTCCACATATCT  
AAGCAATAAAAAAAAAAAAAAAAAAAAAATTTGATTCATTTTGTCTATTTAGTGTCTTCTTA  
AGGTTTAAATGTGTAATAACGGTGGTTTATTAAGTGTCAATATCTATGAAAGTGCACAA  
ATGTGGGAAAACGAAACAAAGCCGCCGGACGCAACTTCTCGGGATCCTCCAAAATGT  
CCACTGAAAAAATCTCAGTAAATGACCACCATTTTACTGAGATTATATTTCAACCCATAT  
CATCTTATTTTATTTTCAATTCATCCAGTTGATTAACTGCTCAAATTAATCATCTTCATTT  
ATTTCACTCCATATTATCATTTTTTATAAAAAATAAGAACATAAAGTAAAGTAAGACATGA  
CCTAAAGGTCTTAGTTACCAGGTCATAAAATCCCTTAAAAAATTTATTTTAAACGTAATT  
CTCGTACCTACCTATGTAGGTACTTATGTACGTAATTGTACCAAAAGTCGGAAATAATAC

TGTTATTTTAGTTATCAGTAATTTGAAATTTGATTTTAGTATTACGTTACGTAAATGTTAC  
GTAACCACATGGTTCAAAAGTGATTTAATTCGGGTCATGAAGTACTTGTCCAAGACTAT  
CTTATATTTATAATGTTATCAATGTATTCTTCATACCCTACATAGAAATAATGGAACAAGG  
CACCATGTACTCCGAAAAGTGAAAAATCGCATTAAATGTAATGTTTTATTTATTAAAGTT  
TGATTATAACAATTAATATCCCAAT

>WS2-Long

TAAGCCCTTTCTAGGACACCCTTTATAATATATAATAATAAAATAAAATAAAATATAACTAGCA  
CTACTACAACATTAATTTATGCATACTTTTGAAAATTTTATAAGCTTGATTAAATTAATAAT  
TACTTAAATATGTATTTTCTGTTGCTTGCAGAACTGGCATCATGAGCAGTCGATTGCCAT  
ATTGAAAAAAGAAAATGTTGACGTTGACAGTCATCTGTGCTGTGACATAAATATTTTAA  
ACGTTGACTTTTTGGCGGGAATGCGAGGAGTGAAATTGTGTGATTTTGAAGTCGTCTGT  
GGCCTAAAGGATAAGACGTCCGGTGCATTTCGTATCGAGCGATGCACTGGTGTTTCAATC  
TCGCTGGCGGGCACCAATTTTTCTAATGAAATACGTACCCAACAAATGTTTACGATTGG  
CCTCCACGATGAAGGAATAACATCGTGCAATATAAATCAAACCCGCAAAATTATAATTT  
GCGTAATCACTGGTGGTAGGACCTCTTGTGAGTCCGCACGGGTAGGTACCACCGCCCC  
GCCTATTTCTGCCGTGAAGCAGTAATGCGTTTCGGTTTGAAGGGTGGGGCAGCCGTTG  
TGACTATACTGAGACCTTAGAACTATATCTCAAGGTGTGTGGCGCATTACGTTGTAGAT  
GTCTATGGGCTCCAGTAACCACTTAACACCAGGTGGGCTGTGAGCTCGTCCACATATCT  
AAGCAATAAAAAAAAAAAAAAAAAAAAAAAAAATTTGATTCATTTTGTCTATTTAGTGTTTC  
TTAAGGTTTAAATGTGTAATAACGGTGGTTTATTAAGTGTCAATATCTATGAAAGTGCA  
CAAATGTGGGAAAACGAAACAAAGCCGCCGGACGCAACTTCTCGGGATCCTCCAAAA  
TGTCCTACTGAAAAATCTCAGTAAATGACCACCATTTTACTGAGATTATATTTCAACCC  
ATATCATCTTATTTTATTTTCAATTCATCCAGTTGATTAACGTCTCAAATTAATCATCTTCA  
TTTCATTTCACTCCATATTATCATTTTTTCATAAAAATAAGAACATAAAGTAAAGTAAGAC  
ATGACCTAAAGGTCTTAGTTACCAGGTCATAAAATCCCTTAAAAAAATTATTTTAAACGT  
AATTCTCGTACCTACCTATGTAGGTACTTATGTACGTAATTGTACCAAAAGTCGGAAATA  
ATACTGTTATTTTAGTTATCAGTAATTTGAAATTTGATTTTAGTATTACGTTACGTAAATGT  
TACGTAACCACATGGTTCAAAAGTGATTTAATTCGGGTCATGAAGTACTTGTCCAAGAC  
TATCTTATATTTATAATGTTATCAATGTATTCTTCATACCCTACATAGAAATAATGGAACAA  
GGCACCATGAACTCCGAAAAGTGAAAAATCGCATTAAATGTAATGTTTTATTTTATTAAA  
GTTTGATTATAACAATTAATATCCCAAT

>WS3-Long

TAAGCCCTTTCTAGGACACCCTTTATAATATAAAATAAACTAGCACTACTACAACATTAAT  
TTATGCATACTTCTGAAGATTTTAGAAGCTTGATTAAATTAAAATTACTTAAATTTCTATTT  
ATTAAATGTGTATTTTCTGTTGCTTGCAGAACTGGCATCATGAGTAGTCGATTGCCATAT  
TGAAAAAAGAAAATGTTGACGTTGACAGTCATCTGTGCTGTGACATCAATATTATAAAC  
GTTGGAGGACTTTTTGGCGGGAACGCGAGGAGTGAAAGTTGTGTGATTTGTTTTATTTTG  
TCCATTTAGTGTTTCTTCAGGTTTAAATGTGTAATAACGGTGGTTTATTAAGTATTTAATA  
TCTGTGAAAGTGCAAAATGTGGGAAAATGAAACAAAGCCGCTGGACGCAACTTCTC  
GGGATCCTCCAAAAAGTCCACTGAAAAAATCTTAGTAAATGACCACCGTTTTACTAAG  
ATTATATTTTCAATCCATATCATCTCATTTTCAATTTTCAATCCAGTTGATTAACGTCTCA  
AATTAATCATTTTCAATTTCAATTTCACTCCATATTATCATTTTTTCATAAAAATAAGAAATATAA  
ACTAAAATAAGACATGACTTAAAGGTCTTAGTTACCAGGTCATAAAATCACTTAAAAAA  
AAAATTATAAACGTTGACTTTTTTGGCGGGAATGCGAGGAGTGGAGTTGTGTGATTTGAT

TCATTTTGTCTATTTAGTGTTTCTTAAGATTTAAATGTGTAATAACGGTGGTTTATTAAC  
 GTTTAATATCTATGAAAGTGCACAAATGTGAGAAAACGAAACAAAGCCGCCGGACGCA  
 ACTTCTCGGGATCCTCCAAAAGTGCCACTGAAAAATCTCAGTAAATGACCACCATTTT  
 ACTGAGATTATATTTCAACCCATATCATCTCATCTCATTTTATTTTATTTTCATCCAGTTGA  
 TTATCGTCTCAAATTAATCATCTTCATTTTCACTCCATATTATCATTTTTTCATAAAAA  
 TAAGAACATAAAGTAAAGTAAGACATGACCTAAAGGTCTTAGTTACCAGGTCATAAAAT  
 CCCTTAAAAAAATTATTTTAAACGTAATCCCGTATACCTACGTAATTGTACCAAAAGTC  
 GGAAATAATACTGTTATTTTAGTTATCAGTAATTTGAAATTTGATTTTAGTATTACGTTAC  
 GTAAATGTTACGTAACCATATGGTTCAAAAGTGATTTAATTCGGGTCATGAAGTACTTGT  
 CCAAGACTATCTTATATTTATAATGTTATCAATGTATTCTTCATACCCTACATAGAAATAAT  
 GGAACAAGGCACCATGAACTCCGAAAAGTGAAAGATCGCATTAAATGTAATGTTTTATTT  
 TATTAAAGTTTGATTATAACAATTAATATCCCAAT

>WS4-Long

TAAGCCCTTTCTAGGACACCCTTTATAATATAAATATAACTAGCACTACTACAACATTAAT  
 TTATGCATACTTCTGAAGATTTTAGAAGCTTGATTAAATTAAAATTACTTAAATTCTATTT  
 ATTAATGTGTATTTTCTGTTGCTTGCGAAGTGGCATCATGAGTAGTCGATTGCCATAT  
 TGAAAAAAGAAAATGTTGACGTTGACAGTCATCTGTGCTGTGACATCAATATTATAAAC  
 GTTGGAGGACTTTTTGGCGGGAACGCGAGGAGTGAAGTTGTGTGATTTGTTTTATTTTG  
 TCCATTTAGTGTTTCTTCAGGTTTAAATGTGTAATAACGGTGGTTTATTAACATTTAATA  
 TCTGTGAAAGTGCACAAATGTGGGAAAATGAAACAAAGCCGCTGGACGCAACTTCTC  
 GGGATCCTCCAAAAAGTCCACTGAAAAAATCTTAGTAAATGACCACCGTTTTACTAAG  
 ATTATATTTTATTCCATATCATCTCATTTTATTTAATTTTATCCAGTTGATTAACGTCTCA  
 AATTAATCATTTTCACTTCACTCCATATTATCATTTTTTCATAAAAAATAAGAATATAA  
 ACTAAAATAAGACATGACTTAAAGGTCTTAGTTACCAGGTCATAAAATCACTTAAAAAA  
 AAAATTATAAACGTTGACTTTTTGGCGGGAATGCGAGGAGTGAAGTTGTGTGATTTGAT  
 TCATTTTGTCTATTTAGTGTTTCTTAAGATTTAAATGTGTAATAACGGTGGTTTATTAAC  
 GTTTAATATCTATGAAAGTGCACAAATGTGAGAAAACGAAACAAAGCCGCCGGACGCA  
 ACTTCTCGGGATCCTCCAAAATGTCCACTGAAAAAATCTCAGTAAATGACCACCATTTT  
 ACTGAGATTATATTTCAACCCATATCATCTCATCTCATTTTATTTTATTTTATCCAGTTGA  
 TTATCGTCTCAAATTAATCATCTTCATTTTCACTCCATATTATCATTTTTTCATAAAAA  
 TAAGAACATAAAGTAAAGTAAGACATGACCTAAAGGTCTTAGTTACCAGGTCATAAAAT  
 CCCTTAAAAAAATTATTTTAAACGTAATCCCGTATACCTACGTAATTGTACCAAAAGTC  
 GGAAATAATACTGTTATTTTAGTTATCAGTAATTTGAAATTTGATTTTAGTATTACGTTAC  
 GTAAATGTTACGTAACCATATGGTTCAAAAGTGATTTAATTCGGGTCATGAAGTACTTGT  
 CCAAGACTATCTTATATTTATAATGTTATCAATGTATTCTTCATACCCTACATAGAAATAAT  
 GGAACAAGGCACCATGAACTCCGAAAAGTGAAAGATCGCATTAAATGTAATGTTTTATTT  
 TATTAAAGTTTGATTATAACAATTAATATCCCAAT

**Figure S2.** The amplified sequences of the upstream region of *Mlx* translation start codon in domesticated and wild silkworm. Domesticated silkworm: DS1-4, wild silkworm: WS1-2.

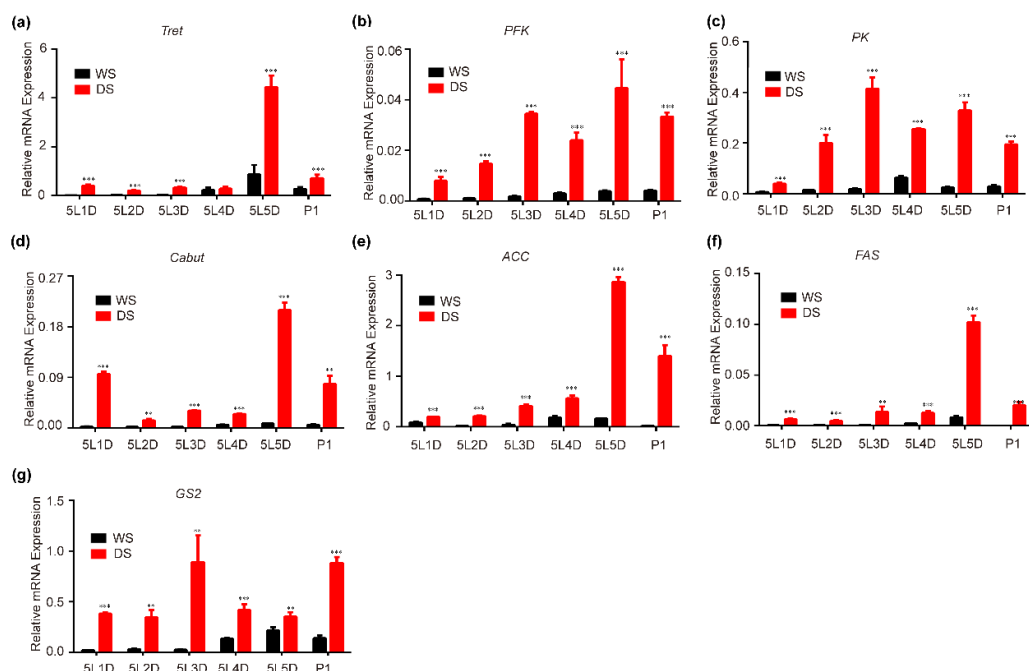

**Figure S3.** The expression of some metabolism-related genes and factors in domesticated and wild silkworm. (a-g) Comparing the expression of *Tret*, *PFK*, *PK*, *Cabut*, *ACC*, *FAS*, and *GS2* in the 5<sup>th</sup> instar and pupal stage of the fat body in domesticated and wild silkworms (DS and WS). 5L1D: the 1<sup>st</sup> day of the 5<sup>th</sup> instar, 5L2D: the 2<sup>nd</sup> day of the 5<sup>th</sup> instar, 5L3D: the 3<sup>rd</sup> day of the 5<sup>th</sup> instar, 5L4D: the 4<sup>th</sup> day of the 5<sup>th</sup> instar, 5L5D: the 5<sup>th</sup> day of the 5<sup>th</sup> instar, P1: the 1<sup>st</sup> day of pupal stage. Error bars show the SD. Significant differences: \*\*p < 0.01, \*\*\*p < 0.001.

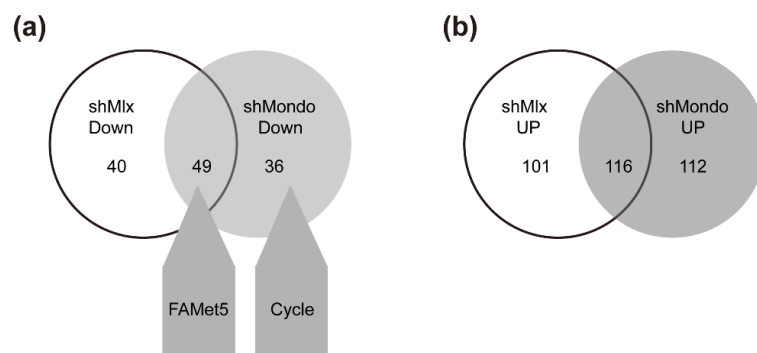

**Figure S4.** The Venn diagram of transcriptomes with *Mlx* or *Mondo* knocked down by shRNA in BmNs cell. (a) The number of genes with decreased expression after interfering with *Mlx* or *Mondo*. (b) The number of genes with increased expression after interfering with *Mlx* or *Mondo*.

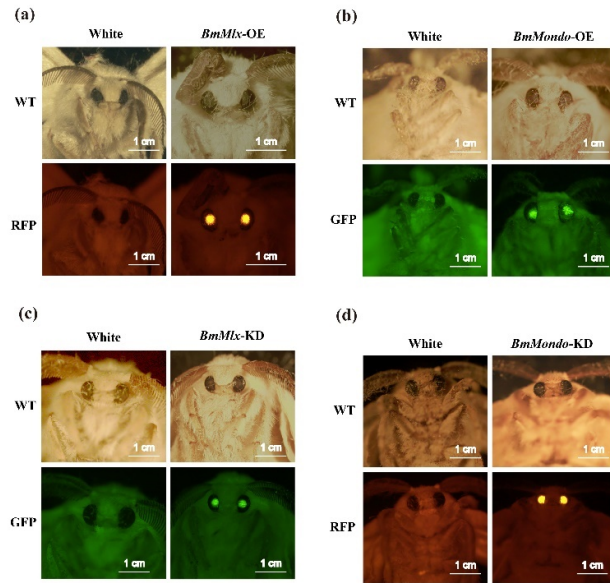

**Figure S5.** *Mlx* and *Mondo* transgenic strains were screened by fluorescence microscopy. (a): The transgenic overexpression of *Mlx* strain (*Mlx*-OE). (b): The transgenic overexpression of *Mondo* strain (*Mondo*-OE). (c): The transgenic knock down of *Mlx* strain (*Mlx*-KD). (d): The transgenic knock down of *Mondo* strain (*Mondo*-KD).

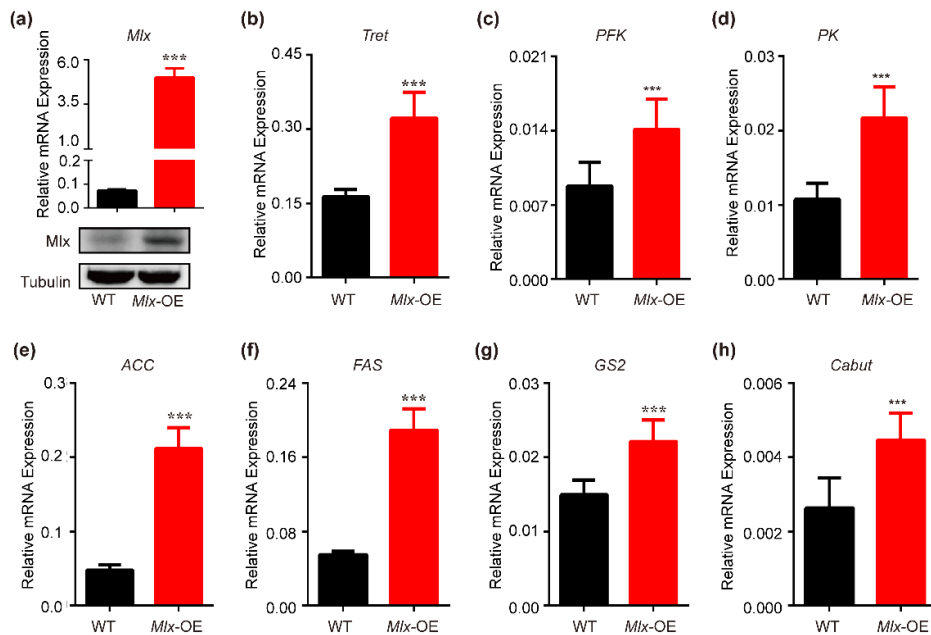

**Figure S6.** The expression of *Mlx* and target genes in transgenic *Mlx*-OE and WT samples. (a–h) The expression of *Mlx*, *Tret*, *PFK*, *PK*, *ACC*, *FAS*, *GS2*, and *Cabut* increased in the *Mlx*-OE strain. Error bars show the SD. Significant differences: \*\*\* $p < 0.001$ .



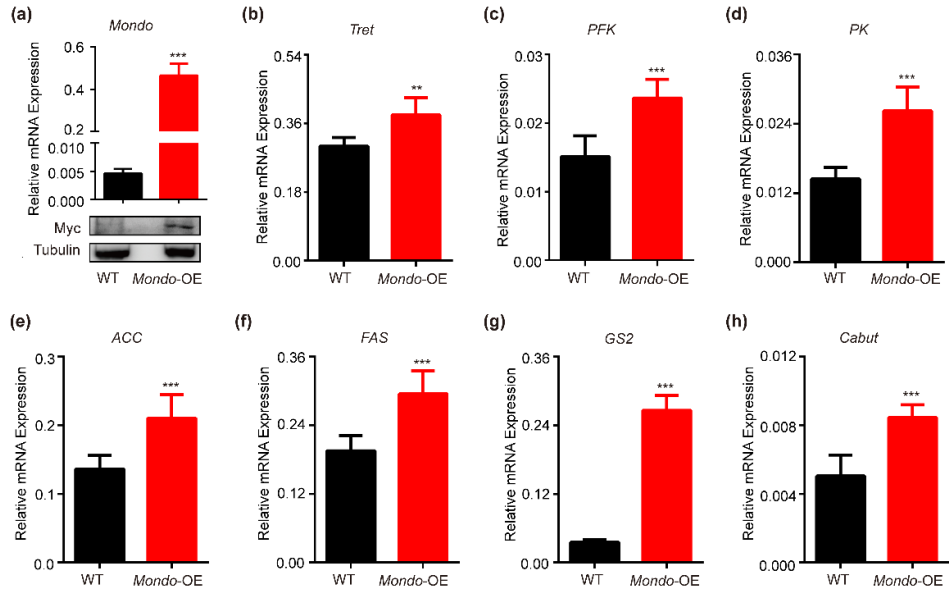

**Figure S7.** The expression of *Mondo* and target genes in transgenic *Mondo*-OE and WT samples. (a–h) The expression of *Mlx*, *Tret*, *PFK*, *PK*, *ACC*, *FAS*, *GS2*, and *Cabut* increased in the *Mondo*-OE strain. Error bars show the SD. Significant differences: \*\*p < 0.01, \*\*\*p < 0.001.

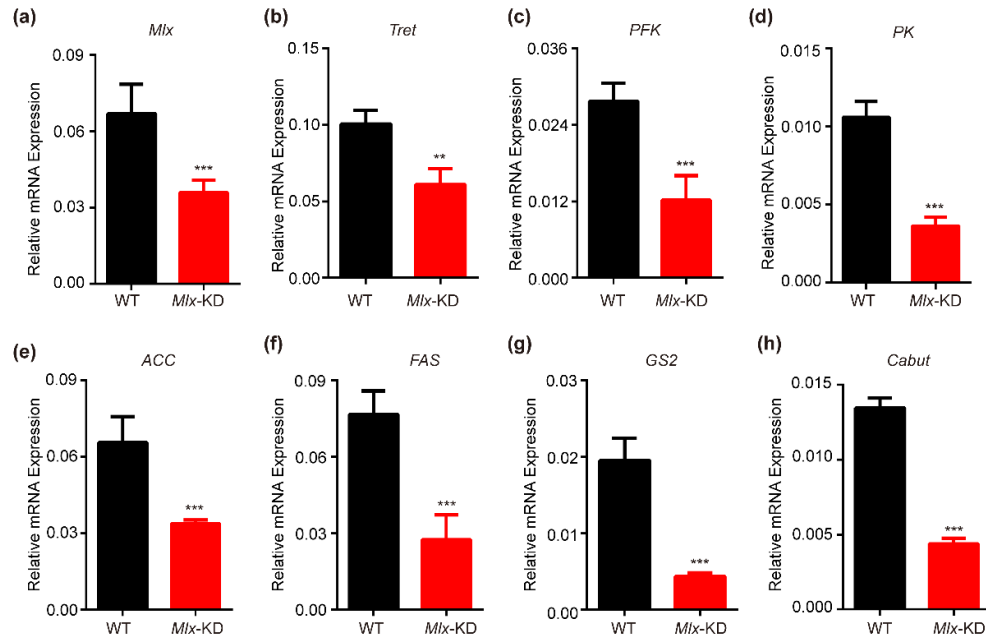

**Figure S8.** The expression of *Mlx* and target genes in transgenic *Mlx*-KD and WT samples. (a–h) The expression of *Mlx*, *Tret*, *PFK*, *PK*, *ACC*, *FAS*, *GS2*, and *Cabut* decreased in the *Mlx*-KD strain. Error bars show the SD. Significant differences: \*\*p < 0.01, \*\*\*p < 0.001.

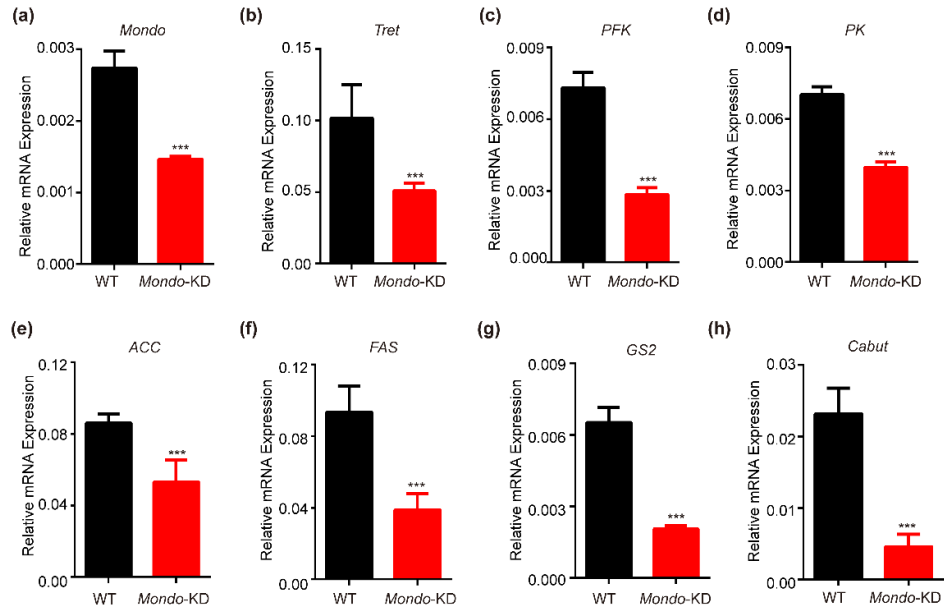

**Figure S9.** The expression of *Mondo* and target genes in transgenic *Mondo*-KD and WT samples. (a-h) The expression of *Mlx*, *Tret*, *PFK*, *PK*, *ACC*, *FAS*, *GS2*, and *Cabut* decreased in the *Mondo*-OE strain. Error bars show the SD. Significant differences: \*\*\* $p < 0.001$ .

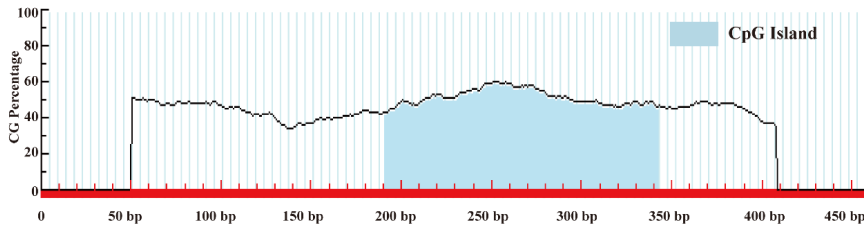

**Figure S10.** The CG percentage of Bm1 sequence.

**Table S1.** Domesticated and wild silkworm samples used in this study.

| Species        | Sample ID | Strain name | Location | TE |
|----------------|-----------|-------------|----------|----|
| <i>B. mori</i> | DS2       | 872         | China    | -  |
| <i>B. mori</i> | DS3       | Qiubai      | China    | -  |
| <i>B. mori</i> | DS4       | Haoyue      | China    | -  |
| <i>B. mori</i> | DS1       | Dazao       | China    | -  |
| <i>B. mori</i> | DS5       | C108T       | Japan    | -  |
| <i>B. mori</i> | DS6       | N4          | Japan    | -  |
| <i>B. mori</i> | DS7       | b20         | Japan    | -  |
| <i>B. mori</i> | DS8       | c10         | Japan    | -  |
| <i>B. mori</i> | DS9       | c51         | Japan    | -  |
| <i>B. mori</i> | DS10      | d18         | Japan    | -  |
| <i>B. mori</i> | DS11      | e10         | Japan    | -  |
| <i>B. mori</i> | DS12      | f35         | Japan    | -  |
| <i>B. mori</i> | DS13      | g53         | Japan    | -  |
| <i>B. mori</i> | DS14      | k25         | Japan    | -  |

| Species             | Sample ID | Strain name | Location | TE |
|---------------------|-----------|-------------|----------|----|
| <i>B. mori</i>      | DS15      | n16         | Japan    | -  |
| <i>B. mori</i>      | DS16      | o55         | Japan    | -  |
| <i>B. mori</i>      | DS17      | o56         | Japan    | -  |
| <i>B. mori</i>      | DS18      | p20         | Japan    | -  |
| <i>B. mori</i>      | DS19      | p21         | Japan    | -  |
| <i>B. mori</i>      | DS20      | p22         | Japan    | -  |
| <i>B. mori</i>      | DS21      | p44         | Japan    | -  |
| <i>B. mandarina</i> | WS1       | Beibei      | China    | +  |
| <i>B. mandarina</i> | WS2       | Changshou   | China    | +  |
| <i>B. mandarina</i> | WS3       | Jiangsu     | China    | +  |
| <i>B. mandarina</i> | WS4       | Rongchang   | China    | +  |

Gray background represents the samples used to perform the polymorphism analysis.

**Table S2.** Potential binding transcription factors of Bm1.

| Matrix Family | Detailed Family Information              | Matrix Similarity | Sequence                |
|---------------|------------------------------------------|-------------------|-------------------------|
| SP1F          | GC-Box factors SP1/GC                    | 0.937             | aggcgGGGCggtggtac       |
| KLFS          | Krueppel like transcription factors      | 0.891             | ataggcGGGcgggtggtac     |
| GLIF          | GLI zinc finger family                   | 0.938             | accaccgCCCCgcctat       |
| E2FF          | E2F-myc activator/cell cycle regulator   | 0.973             | aataGGCGgggcggtgg       |
| KLFS          | Krueppel like transcription factors      | 0.937             | gaaataggcGGGcgggtgg     |
| SP1F          | GC-Box factors SP1/GC                    | 0.903             | gaaataGGCGgggcggt       |
| HOXF          | Hox clusters A, B, C, D                  | 0.823             | agcagTAATgcgttcggt      |
| HOMF          | Homeodomain transcription factors        | 0.851             | tcaaaccgAAACgcattac     |
| IRFF          | Interferon regulatory factors            | 0.945             | ccaccctcaaacGAAAcgcatta |
| CHRF          | Cell cycle homology element              | 0.954             | cggTGAagggt             |
| ZF02          | C2H2 zinc finger transcription factors 2 | 1                 | ggctgCCCCacccttcaaaccga |
| SAL2          | Spalt-like transcription factor 2        | 0.953             | aaggGTGGggc             |
| SP1F          | GC-Box factors SP1/GC                    | 0.914             | ttgaagGGTGgggcagc       |
| KLFS          | Krueppel like transcription factors      | 0.996             | ttgaGGGTggggcagccg      |

**Table S3.** Transcriptome of control vs. the knock down of *Mlx* in BmNs cells.

Up

| ID            | AveExpr   | Foldchange | P.value   |
|---------------|-----------|------------|-----------|
| BGIBMGA000116 | 19.624103 | 3.2304346  | 0.0025358 |
| BGIBMGA000117 | 195.16167 | 2.5595289  | 5.545E-16 |
| BGIBMGA000135 | 62.392665 | 2.1423068  | 7.864E-05 |
| BGIBMGA000196 | 19.698035 | 2.0522563  | 0.0486403 |
| BGIBMGA000223 | 16.422248 | 2.3748691  | 0.0265613 |
| BGIBMGA000395 | 21222.974 | 2.1502583  | 1.501E-14 |
| BGIBMGA000458 | 20.255612 | 2.0220379  | 0.0431847 |
| BGIBMGA000476 | 514.8335  | 2.3733773  | 1.029E-31 |
| BGIBMGA000551 | 18.532224 | 2.3716452  | 0.0334874 |
| BGIBMGA000561 | 13.044966 | 2.52876    | 0.0496366 |

| ID            | AveExpr   | Foldchange | P.value   |
|---------------|-----------|------------|-----------|
| BGIBMGA000590 | 543.86276 | 2.7499058  | 1.055E-44 |
| BGIBMGA000648 | 199.84405 | 2.0791779  | 1.419E-06 |
| BGIBMGA000667 | 1905.3998 | 2.2741547  | 4.939E-85 |
| BGIBMGA000691 | 24.248299 | 2.2361649  | 0.0160307 |
| BGIBMGA000736 | 21.816913 | 2.9051963  | 0.0029713 |
| BGIBMGA000876 | 37.448152 | 2.3237055  | 0.0013685 |
| BGIBMGA001367 | 275.47526 | 3.3965357  | 3.852E-32 |
| BGIBMGA001376 | 18.043965 | 4.8274793  | 0.00032   |
| BGIBMGA001384 | 6.4310965 | 10.05204   | 0.009529  |
| BGIBMGA001399 | 316.47885 | 2.0546119  | 1.62E-16  |
| BGIBMGA001613 | 642.00881 | 2.1800302  | 7.577E-21 |
| BGIBMGA001755 | 949.82259 | 2.2187386  | 1.039E-47 |
| BGIBMGA001815 | 13.493701 | 3.1245851  | 0.0141404 |
| BGIBMGA001836 | 22.70069  | 2.3163796  | 0.0114229 |
| BGIBMGA001862 | 21.99046  | 2.5557269  | 0.006298  |
| BGIBMGA001905 | 12.263037 | 3.980299   | 0.0065645 |
| BGIBMGA001941 | 6.4495794 | 5.3384711  | 0.0359889 |
| BGIBMGA002000 | 20.024059 | 2.1982355  | 0.0282093 |
| BGIBMGA002049 | 84.054868 | 2.1099607  | 1.139E-05 |
| BGIBMGA002077 | 17.763987 | 2.746572   | 0.0096779 |
| BGIBMGA002216 | 53.722536 | 2.7341956  | 8.096E-06 |
| BGIBMGA002365 | 22.136267 | 2.0225709  | 0.0350008 |
| BGIBMGA002367 | 32.333466 | 2.3387257  | 0.0024566 |
| BGIBMGA002505 | 17.405611 | 2.4345519  | 0.0232845 |
| BGIBMGA002576 | 22.705304 | 2.5157456  | 0.0085141 |
| BGIBMGA002584 | 41.543012 | 4.7049828  | 6.882E-06 |
| BGIBMGA002596 | 1118.8352 | 2.0294585  | 5.251E-44 |
| BGIBMGA002902 | 46.449271 | 2.1190104  | 0.0007436 |
| BGIBMGA002986 | 61.731213 | 4.9364762  | 6.233E-12 |
| BGIBMGA002989 | 336.99884 | 2.3304161  | 5.648E-22 |
| BGIBMGA003149 | 23.991594 | 3.2457697  | 0.0007062 |
| BGIBMGA003217 | 17.340581 | 2.5195977  | 0.0181917 |
| BGIBMGA003268 | 184.51383 | 2.0460034  | 2.491E-08 |
| BGIBMGA003269 | 94.800387 | 2.0536451  | 2.774E-05 |
| BGIBMGA003503 | 14.692013 | 2.5337952  | 0.0381396 |
| BGIBMGA003514 | 21.750005 | 2.5033792  | 0.0074963 |
| BGIBMGA003568 | 14.247744 | 4.7198095  | 0.0017829 |
| BGIBMGA003660 | 19.112572 | 3.3103772  | 0.0022844 |
| BGIBMGA003714 | 21.867749 | 2.0267961  | 0.0406657 |
| BGIBMGA003740 | 21.830783 | 2.9300571  | 0.0024897 |
| BGIBMGA003754 | 13.438252 | 2.4425187  | 0.0443467 |
| BGIBMGA003783 | 1178.0396 | 5.4245354  | 4.27E-181 |
| BGIBMGA003817 | 14.564689 | 2.3430032  | 0.048487  |

| ID            | AveExpr   | Foldchange | P.value   |
|---------------|-----------|------------|-----------|
| BGIBMGA003901 | 40.626735 | 3.8497011  | 8.444E-07 |
| BGIBMGA003917 | 68.94662  | 2.0919563  | 8.14E-05  |
| BGIBMGA003959 | 21.345082 | 2.0845722  | 0.0312348 |
| BGIBMGA003960 | 27.005709 | 2.1031489  | 0.0120503 |
| BGIBMGA004060 | 23.788104 | 5.5024796  | 1.181E-05 |
| BGIBMGA004172 | 30.575344 | 2.0196537  | 0.0118641 |
| BGIBMGA004242 | 9.6882242 | 5.1264547  | 0.036459  |
| BGIBMGA004243 | 226.47942 | 2.0838435  | 1.077E-12 |
| BGIBMGA004280 | 75.872496 | 2.3172612  | 3.533E-06 |
| BGIBMGA004300 | 37.496932 | 2.085937   | 0.0038466 |
| BGIBMGA004353 | 20.815067 | 3.350239   | 0.0091095 |
| BGIBMGA004391 | 14.504449 | 2.4079314  | 0.0489974 |
| BGIBMGA004413 | 24.084009 | 8.8221992  | 3.134E-07 |
| BGIBMGA004414 | 476.38309 | 4.3963989  | 3.608E-69 |
| BGIBMGA004460 | 804.25814 | 2.1016784  | 2.933E-37 |
| BGIBMGA004497 | 21.504582 | 2.9209617  | 0.0038615 |
| BGIBMGA004598 | 302.04485 | 2.7846965  | 2.3E-15   |
| BGIBMGA004614 | 3118.4549 | 2.1177469  | 2.028E-97 |
| BGIBMGA004653 | 3.3497192 | Inf        | 0.0334813 |
| BGIBMGA004707 | 14.670973 | 4.0015383  | 0.0033332 |
| BGIBMGA004730 | 40.84427  | 2.4745998  | 0.0007204 |
| BGIBMGA004810 | 4.2449561 | 13.533281  | 0.0334884 |
| BGIBMGA004911 | 845.68059 | 2.6527586  | 1.608E-10 |
| BGIBMGA004945 | 262.77131 | 2.5399626  | 1.864E-10 |
| BGIBMGA005012 | 56.503043 | 2.1971077  | 0.000141  |
| BGIBMGA005073 | 16.759908 | 2.598175   | 0.0172961 |
| BGIBMGA005135 | 69.596435 | 2.3522867  | 5.293E-05 |
| BGIBMGA005143 | 29.800261 | 2.1449161  | 0.0065811 |
| BGIBMGA005190 | 64.248168 | 2.0677736  | 0.0001451 |
| BGIBMGA005302 | 1394.9316 | 2.3430063  | 3.916E-18 |
| BGIBMGA005303 | 4831.6454 | 2.353802   | 3.757E-05 |
| BGIBMGA005330 | 38.067876 | 2.0011933  | 0.0291181 |
| BGIBMGA005572 | 49.331596 | 2.1862336  | 0.0004283 |
| BGIBMGA005602 | 489.08567 | 2.2327122  | 6.671E-23 |
| BGIBMGA005664 | 5.4756204 | 5.5968658  | 0.0489146 |
| BGIBMGA005780 | 35.382342 | 2.103128   | 0.0061942 |
| BGIBMGA005785 | 22.804918 | 3.4718007  | 0.0024049 |
| BGIBMGA005788 | 15.02506  | 2.397927   | 0.0436682 |
| BGIBMGA005860 | 1389.7075 | 2.2020372  | 1.103E-36 |
| BGIBMGA005861 | 3515.4268 | 2.0652036  | 5.939E-60 |
| BGIBMGA006032 | 11.406999 | 3.5030032  | 0.0308182 |
| BGIBMGA006112 | 24.829149 | 2.0641969  | 0.0209085 |
| BGIBMGA006125 | 24.400953 | 2.2746661  | 0.0128961 |

| ID            | AveExpr   | Foldchange | P.value   |
|---------------|-----------|------------|-----------|
| BGIBMGA006280 | 37.762893 | 2.6204853  | 0.0002068 |
| BGIBMGA006337 | 5.8249174 | Inf        | 0.0017629 |
| BGIBMGA006338 | 17.160365 | 2.3176859  | 0.0349791 |
| BGIBMGA006414 | 17775.11  | 2.1390059  | 2E-188    |
| BGIBMGA006457 | 26.226337 | 2.9174471  | 0.0009611 |
| BGIBMGA006553 | 18.934589 | 4.6450224  | 0.0001954 |
| BGIBMGA006671 | 130.53596 | 2.1870999  | 1.449E-06 |
| BGIBMGA006882 | 101.71034 | 2.1139487  | 1.973E-05 |
| BGIBMGA006949 | 10.928144 | 6.4092574  | 0.0026798 |
| BGIBMGA007144 | 326.9052  | 2.8586935  | 6.978E-30 |
| BGIBMGA007147 | 77.996342 | 2.0309512  | 5.111E-05 |
| BGIBMGA007316 | 340.14936 | 2.6493194  | 9.361E-28 |
| BGIBMGA007354 | 26.716828 | 4.2947223  | 8.6E-05   |
| BGIBMGA007421 | 25.522953 | 5.3277231  | 9.198E-06 |
| BGIBMGA007552 | 19.017924 | 2.0269745  | 0.0450523 |
| BGIBMGA007684 | 242.51355 | 2.3182842  | 2.555E-08 |
| BGIBMGA007697 | 1036.9321 | 2.0853912  | 1.18E-44  |
| BGIBMGA007699 | 45.267033 | 2.066829   | 0.0016172 |
| BGIBMGA007701 | 12368.665 | 2.1064721  | 4.56E-168 |
| BGIBMGA007834 | 30.880829 | 2.0304585  | 0.0123313 |
| BGIBMGA008050 | 33.540857 | 2.2902526  | 0.0028449 |
| BGIBMGA008068 | 9.1862733 | 3.801849   | 0.0329067 |
| BGIBMGA008115 | 10.872695 | 3.1440437  | 0.0246884 |
| BGIBMGA008127 | 32.816933 | 2.7076247  | 0.0004727 |
| BGIBMGA008132 | 312.29014 | 3.7061315  | 8.727E-37 |
| BGIBMGA008177 | 5.6839    | 6.0699445  | 0.0373373 |
| BGIBMGA008320 | 24.220412 | 2.0193127  | 0.0245121 |
| BGIBMGA008398 | 9.4453881 | 5.0771914  | 0.0082814 |
| BGIBMGA008401 | 355.50441 | 2.7653793  | 7.926E-31 |
| BGIBMGA008418 | 19.57071  | 2.1114031  | 0.0330896 |
| BGIBMGA008431 | 10.939781 | 5.3859543  | 0.0046395 |
| BGIBMGA008594 | 34.848039 | 2.0953396  | 0.0037575 |
| BGIBMGA008632 | 9.4755077 | 4.6262248  | 0.0387599 |
| BGIBMGA008655 | 36.585268 | 2.5542061  | 0.0004959 |
| BGIBMGA008656 | 8.8438226 | 3.47898    | 0.0413779 |
| BGIBMGA008803 | 45.146731 | 2.2257789  | 0.0005514 |
| BGIBMGA008855 | 17.831072 | 2.1838208  | 0.0327379 |
| BGIBMGA008903 | 5718.2016 | 2.7057137  | 1.374E-09 |
| BGIBMGA008979 | 6.0817995 | 5.0340509  | 0.0479278 |
| BGIBMGA008987 | 22.126863 | 2.2425348  | 0.013614  |
| BGIBMGA009037 | 360.99255 | 2.0231151  | 1.448E-13 |
| BGIBMGA009120 | 101.37679 | 2.6927796  | 1.077E-09 |
| BGIBMGA009123 | 11.34914  | 4.0090892  | 0.0109842 |

| ID            | AveExpr   | Foldchange | P.value   |
|---------------|-----------|------------|-----------|
| BGIBMGA009148 | 368.43178 | 2.1440586  | 1.726E-20 |
| BGIBMGA009436 | 14.937259 | 3.1291749  | 0.0147979 |
| BGIBMGA009456 | 12.979937 | 3.320889   | 0.0156441 |
| BGIBMGA009490 | 27.163153 | 2.6030188  | 0.0025475 |
| BGIBMGA009551 | 60.234411 | 3.0792138  | 1.375E-07 |
| BGIBMGA009584 | 36.673394 | 2.0716355  | 0.0175803 |
| BGIBMGA009614 | 77.959199 | 3.1487267  | 1.352E-09 |
| BGIBMGA009675 | 12.367088 | 2.9204268  | 0.0271743 |
| BGIBMGA009776 | 10.155442 | 3.6802755  | 0.023519  |
| BGIBMGA009799 | 218.78498 | 2.0772999  | 2.051E-12 |
| BGIBMGA009812 | 23.501103 | 2.7092866  | 0.0046047 |
| BGIBMGA009828 | 25.233895 | 2.985439   | 0.0013222 |
| BGIBMGA009833 | 18.488086 | 2.0558949  | 0.0377775 |
| BGIBMGA009857 | 73.471082 | 2.5694069  | 3.916E-07 |
| BGIBMGA009960 | 25.280117 | 2.1216847  | 0.0134339 |
| BGIBMGA010104 | 115.99011 | 2.2310844  | 2.836E-08 |
| BGIBMGA010403 | 387.17196 | 2.3152472  | 6.552E-25 |
| BGIBMGA010461 | 127.88789 | 2.3882457  | 1.008E-06 |
| BGIBMGA010530 | 3.816937  | 12.16872   | 0.0489939 |
| BGIBMGA010701 | 42.107258 | 2.3225407  | 0.0032199 |
| BGIBMGA010825 | 57.837935 | 3.7134376  | 1.55E-08  |
| BGIBMGA011048 | 43.323905 | 2.0615648  | 0.0022427 |
| BGIBMGA011090 | 191.59617 | 2.1309133  | 8.6E-09   |
| BGIBMGA011126 | 20.089088 | 2.1694835  | 0.0280056 |
| BGIBMGA011170 | 109.00623 | 2.1608295  | 2.51E-07  |
| BGIBMGA011253 | 1003.3577 | 2.0820039  | 1.997E-07 |
| BGIBMGA011346 | 34.637527 | 2.9192198  | 0.0001538 |
| BGIBMGA011573 | 37.033826 | 2.2964652  | 0.0012895 |
| BGIBMGA011607 | 69.008915 | 2.6714427  | 6.004E-07 |
| BGIBMGA011620 | 36653.875 | 2.0156831  | 4.31E-180 |
| BGIBMGA011629 | 46.638891 | 2.002543   | 0.0021877 |
| BGIBMGA011685 | 4.0483131 | 14.245793  | 0.0464261 |
| BGIBMGA011698 | 22.450831 | 2.0472624  | 0.0261284 |
| BGIBMGA011787 | 71.162555 | 3.6355852  | 2.807E-10 |
| BGIBMGA011811 | 20.200163 | 2.576947   | 0.0265532 |
| BGIBMGA011832 | 41.950167 | 2.1021593  | 0.008749  |
| BGIBMGA011948 | 12939.476 | 2.0534375  | 1.42E-160 |
| BGIBMGA012157 | 16.672107 | 2.2141196  | 0.0415522 |
| BGIBMGA012236 | 51.952779 | 2.2458135  | 0.0002827 |
| BGIBMGA012340 | 7.8467671 | 4.285825   | 0.0315478 |
| BGIBMGA012362 | 92.431826 | 2.5524525  | 1.323E-05 |
| BGIBMGA012363 | 34.440884 | 3.1406199  | 7.535E-05 |
| BGIBMGA012488 | 133.53465 | 3.9135325  | 4.23E-14  |

| ID            | AveExpr   | Foldchange | P.value   |
|---------------|-----------|------------|-----------|
| BGIBMGA012626 | 22445.623 | 2.0351194  | 6.37E-169 |
| BGIBMGA012646 | 40.702899 | 2.5381513  | 0.0002572 |
| BGIBMGA012668 | 16.850267 | 2.4922463  | 0.0221964 |
| BGIBMGA012676 | 66.38124  | 2.0916799  | 0.0001147 |
| BGIBMGA012786 | 10.067641 | 6.6701572  | 0.0298737 |
| BGIBMGA012836 | 21.553185 | 2.9746766  | 0.0191958 |
| BGIBMGA012943 | 4.0923021 | 12.548751  | 0.0497241 |
| BGIBMGA012999 | 4.2264731 | Inf        | 0.0101871 |
| BGIBMGA013111 | 1343.8065 | 2.3652635  | 2.367E-71 |
| BGIBMGA013130 | 9.850134  | 6.1824997  | 0.0034257 |
| BGIBMGA013138 | 90.967376 | 2.2642274  | 2.009E-06 |
| BGIBMGA013379 | 52.790009 | 3.0994932  | 7.939E-07 |
| BGIBMGA013511 | 951.4603  | 2.1264365  | 2.201E-27 |
| BGIBMGA013604 | 9.3829162 | 4.3659015  | 0.0170302 |
| BGIBMGA013748 | 10.812456 | 2.5961565  | 0.0461292 |
| BGIBMGA013775 | 23.725484 | 2.0087399  | 0.0270114 |
| BGIBMGA013781 | 95.956823 | 2.3115884  | 9.337E-07 |
| BGIBMGA013844 | 6.5283016 | 22.972737  | 0.0034802 |
| BGIBMGA013849 | 27.28792  | 2.3049014  | 0.0069295 |
| BGIBMGA013865 | 6.61387   | 11.06287   | 0.009207  |
| BGIBMGA013882 | 14.921009 | 2.4412287  | 0.0344361 |
| BGIBMGA013931 | 63.824585 | 2.0066893  | 0.0003048 |
| BGIBMGA013966 | 252.4164  | 2.424399   | 4.8E-16   |
| BGIBMGA013975 | 23.820132 | 2.9831506  | 0.0479644 |
| BGIBMGA013991 | 20.843131 | 2.1982246  | 0.0248487 |
| BGIBMGA014204 | 13.479832 | 2.9336555  | 0.0234071 |
| BGIBMGA014329 | 11.349317 | 3.3388155  | 0.0195427 |
| BGIBMGA014372 | 32.613119 | 2.3312143  | 0.0017736 |
| BGIBMGA014391 | 8.4413096 | 4.5989954  | 0.0187973 |
| BGIBMGA014404 | 214.94509 | 2.5277705  | 3.012E-17 |
| BGIBMGA014407 | 28.317505 | 2.1894101  | 0.0084151 |
| BGIBMGA014460 | 14.363432 | 6.9703052  | 0.00033   |
| BGIBMGA014465 | 15.38138  | 2.4994012  | 0.0239856 |
| BGIBMGA014547 | 87.880884 | 2.1592844  | 2.924E-06 |
| BGIBMGA014617 | 29.726152 | 2.6583324  | 0.0012853 |

Down

| ID            | AveExpr   | Foldchange | P.value   |
|---------------|-----------|------------|-----------|
| BGIBMGA000315 | 5.2928469 | 0.2863517  | 0.0026305 |
| BGIBMGA000444 | 3787.287  | 0.3573263  | 6.17E-288 |
| BGIBMGA000520 | 8.6056002 | 0.1925695  | 4.594E-09 |
| BGIBMGA000659 | 1.3232559 | 0.1403396  | 0.017968  |
| BGIBMGA000670 | 1.3903414 | 0.1922553  | 0.0284808 |



| ID            | AveExpr   | Foldchange | P.value   |
|---------------|-----------|------------|-----------|
| BGIBMGA000863 | 166.24518 | 0.4766407  | 2.928E-18 |
| BGIBMGA000864 | 877.90238 | 0.4471482  | 1.754E-82 |
| BGIBMGA000941 | 36.712593 | 0.4536212  | 5.055E-06 |
| BGIBMGA001092 | 33.126707 | 0.3535861  | 1.185E-09 |
| BGIBMGA001146 | 19.552227 | 0.1527634  | 5.496E-27 |
| BGIBMGA001198 | 0.795799  | 0.1024946  | 0.0047481 |
| BGIBMGA001466 | 0.330814  | 0.0763017  | 0.0449344 |
| BGIBMGA001575 | 195.60373 | 0.3643825  | 3.16E-42  |
| BGIBMGA001576 | 575.27781 | 0.397187   | 8.681E-84 |
| BGIBMGA001611 | 20.32252  | 0.4046733  | 5.01E-05  |
| BGIBMGA001890 | 8.1960641 | 0.4572919  | 0.0370473 |
| BGIBMGA002204 | 2.6880913 | 0.2934504  | 0.0318005 |
| BGIBMGA002389 | 9.3596429 | 0.4185649  | 0.0091531 |
| BGIBMGA002436 | 63.667643 | 0.4058019  | 0.0070336 |
| BGIBMGA002437 | 45.044884 | 0.3368735  | 3.563E-13 |
| BGIBMGA002474 | 2.1375378 | 0.1363687  | 0.0004385 |
| BGIBMGA002475 | 6.6693189 | 0.2229814  | 5.848E-06 |
| BGIBMGA002548 | 0         | 0          | 0.0420155 |
| BGIBMGA002847 | 5.3229665 | 0.3864999  | 0.0364579 |
| BGIBMGA002937 | 1.0109249 | 0.0696487  | 2.32E-05  |
| BGIBMGA003045 | 482.99241 | 0.404044   | 6.633E-69 |
| BGIBMGA003122 | 16.16331  | 0.411832   | 0.0005035 |
| BGIBMGA003151 | 1910.29   | 0.4943686  | 1.464E-96 |
| BGIBMGA003167 | 17.43094  | 0.2238009  | 2.912E-13 |
| BGIBMGA003170 | 20.88233  | 0.2051721  | 9.413E-18 |
| BGIBMGA003171 | 157.71748 | 0.1551452  | 5.18E-116 |
| BGIBMGA003203 | 144.75441 | 0.4462013  | 3.386E-11 |
| BGIBMGA003249 | 12.258247 | 0.4511355  | 0.0113775 |
| BGIBMGA003497 | 1359.8267 | 0.4379244  | 1.319E-41 |
| BGIBMGA003572 | 0         | 0          | 0.0018425 |
| BGIBMGA003705 | 72.749688 | 0.4751996  | 2.023E-09 |
| BGIBMGA004037 | 337.12769 | 0.4767288  | 2.181E-33 |
| BGIBMGA004303 | 40.205385 | 0.4794905  | 1.777E-05 |
| BGIBMGA004470 | 0.330814  | 0.051383   | 0.0058015 |
| BGIBMGA005013 | 51.781642 | 0.3893134  | 2.191E-11 |
| BGIBMGA005060 | 28.965263 | 0.4542471  | 6.181E-05 |
| BGIBMGA005891 | 14.696479 | 0.4095929  | 0.0018978 |
| BGIBMGA006318 | 14.516086 | 0.4966203  | 0.0118912 |
| BGIBMGA006351 | 103.45444 | 0.4513327  | 3.286E-14 |
| BGIBMGA006413 | 6.3686245 | 0.3688452  | 0.0105038 |
| BGIBMGA006678 | 11.226606 | 0.2924224  | 1.465E-05 |
| BGIBMGA006699 | 60.645826 | 0.4195153  | 1.468E-06 |
| BGIBMGA006875 | 327.4561  | 0.3479214  | 1.831E-50 |

| ID            | AveExpr   | Foldchange | P.value   |
|---------------|-----------|------------|-----------|
| BGIBMGA006886 | 392.09756 | 0.4209919  | 1.992E-22 |
| BGIBMGA006894 | 53.150766 | 0.4749398  | 4.39E-07  |
| BGIBMGA007045 | 4.5271675 | 0.3505699  | 0.0325324 |
| BGIBMGA007199 | 15.545494 | 0.3929363  | 0.0002507 |
| BGIBMGA007223 | 17.659935 | 0.449025   | 0.0019189 |
| BGIBMGA007297 | 1148.8668 | 0.4760931  | 3.953E-81 |
| BGIBMGA007630 | 161.32491 | 0.4886682  | 2.337E-12 |
| BGIBMGA007740 | 1257.8935 | 0.4724193  | 2.714E-88 |
| BGIBMGA008361 | 1.3602218 | 0.1892682  | 0.0341131 |
| BGIBMGA008374 | 2.2046233 | 0.1419718  | 0.0001764 |
| BGIBMGA008607 | 1.4273073 | 0.2021414  | 0.0345426 |
| BGIBMGA008856 | 44.258341 | 0.4338125  | 1.241E-07 |
| BGIBMGA008986 | 8.9432605 | 0.422817   | 0.0161563 |
| BGIBMGA009184 | 19.05489  | 0.4307932  | 0.0004428 |
| BGIBMGA009479 | 814.87172 | 0.4530306  | 2.974E-75 |
| BGIBMGA010112 | 0         | 0          | 0.0198057 |
| BGIBMGA010221 | 411.96679 | 0.4925487  | 1.079E-22 |
| BGIBMGA010535 | 0         | 0          | 0.027602  |
| BGIBMGA010561 | 460.69676 | 0.4935156  | 3.565E-31 |
| BGIBMGA010652 | 17.375314 | 0.397328   | 0.0001034 |
| BGIBMGA010860 | 1.1936985 | 0.1720094  | 0.0187756 |
| BGIBMGA010987 | 2.8361317 | 0.3085091  | 0.048932  |
| BGIBMGA011010 | 12.746505 | 0.3871869  | 0.001112  |
| BGIBMGA011227 | 4.9736695 | 0.32119    | 0.0096426 |
| BGIBMGA011261 | 0.330814  | 0.0746435  | 0.0435301 |
| BGIBMGA011304 | 20.972512 | 0.145424   | 1.392E-31 |
| BGIBMGA011441 | 73.313638 | 0.2304877  | 2.537E-45 |
| BGIBMGA011525 | 1409.407  | 0.4848946  | 6.147E-87 |
| BGIBMGA011821 | 194.34909 | 0.4910325  | 3.492E-14 |
| BGIBMGA011876 | 1.0294078 | 0.1610548  | 0.0316077 |
| BGIBMGA011934 | 19.135845 | 0.4997924  | 0.0064284 |
| BGIBMGA011942 | 7.9509953 | 0.2169225  | 7.98E-05  |
| BGIBMGA012345 | 9.8129913 | 0.2864069  | 2.317E-05 |
| BGIBMGA012346 | 57.798412 | 0.3204995  | 6.943E-16 |
| BGIBMGA012439 | 8.813703  | 0.4741638  | 0.0388633 |
| BGIBMGA012511 | 13.433462 | 0.1399982  | 1.211E-21 |
| BGIBMGA012883 | 22.864656 | 0.2301594  | 2.87E-08  |
| BGIBMGA013003 | 0         | 0          | 0.0260678 |
| BGIBMGA013007 | 36.104181 | 0.4113289  | 1.242E-07 |
| BGIBMGA013008 | 4.0923021 | 0.2752576  | 0.0077173 |
| BGIBMGA013909 | 267.49429 | 0.4681508  | 3.436E-29 |

**Table S4.** Transcriptome of control vs. the knock down of *Mondo* in BmNs cells.

Up

| ID            | AveExpr   | Foldchange | P.value   |
|---------------|-----------|------------|-----------|
| BGIBMGA000030 | 71.185363 | 2.0824685  | 5.681E-05 |
| BGIBMGA000116 | 24.547058 | 3.9991812  | 0.0001115 |
| BGIBMGA000117 | 194.60164 | 2.5257637  | 1.332E-15 |
| BGIBMGA000223 | 21.594461 | 3.0924384  | 0.0014531 |
| BGIBMGA000389 | 14.099644 | 2.4272366  | 0.0418729 |
| BGIBMGA000476 | 542.44226 | 2.4751899  | 6.647E-37 |
| BGIBMGA000477 | 20.221658 | 2.0553011  | 0.0392541 |
| BGIBMGA000561 | 16.40784  | 3.1472723  | 0.0407726 |
| BGIBMGA000590 | 488.23975 | 2.4437521  | 3.095E-33 |
| BGIBMGA000736 | 22.40439  | 2.9547924  | 0.0015077 |
| BGIBMGA000776 | 4.4025165 | Inf        | 0.0162378 |
| BGIBMGA001051 | 39.882192 | 2.4737447  | 0.0003385 |
| BGIBMGA001063 | 28.126313 | 2.2006033  | 0.0090703 |
| BGIBMGA001121 | 15.752412 | 3.2276661  | 0.0064595 |
| BGIBMGA001161 | 8.9302088 | 5.7007207  | 0.0268313 |
| BGIBMGA001193 | 12.533184 | 3.5812494  | 0.0098971 |
| BGIBMGA001274 | 20.391883 | 2.730966   | 0.0060666 |
| BGIBMGA001367 | 232.52977 | 2.8376519  | 7.606E-22 |
| BGIBMGA001376 | 22.114679 | 5.8584301  | 0.033853  |
| BGIBMGA001384 | 5.9230201 | 9.1735476  | 0.0139565 |
| BGIBMGA001513 | 45.116606 | 2.0707309  | 0.0013615 |
| BGIBMGA001546 | 2971.7963 | 2.0148475  | 1.506E-78 |
| BGIBMGA001613 | 632.88124 | 2.127252   | 1.962E-31 |
| BGIBMGA001642 | 68.945093 | 2.0014333  | 0.000149  |
| BGIBMGA001721 | 26.114713 | 2.1158406  | 0.0133526 |
| BGIBMGA001836 | 24.87537  | 2.5125757  | 0.0043943 |
| BGIBMGA001993 | 54.701602 | 2.3510713  | 7.094E-05 |
| BGIBMGA002015 | 11.931153 | 2.8232228  | 0.0354935 |
| BGIBMGA002049 | 81.852545 | 2.0333637  | 3.312E-05 |
| BGIBMGA002077 | 16.145062 | 2.4711017  | 0.0227147 |
| BGIBMGA002216 | 69.172857 | 3.4834735  | 2.657E-08 |
| BGIBMGA002285 | 4.0006749 | 12.637544  | 0.0466712 |
| BGIBMGA002367 | 34.479389 | 2.4684973  | 0.0007395 |
| BGIBMGA002438 | 29.463547 | 2.0260829  | 0.0128145 |
| BGIBMGA002505 | 19.84739  | 2.7487167  | 0.0056051 |
| BGIBMGA002526 | 39.893774 | 2.240954   | 0.0012913 |
| BGIBMGA002584 | 32.209154 | 3.6101773  | 2.357E-05 |
| BGIBMGA002986 | 62.723726 | 4.9646753  | 4.325E-12 |
| BGIBMGA002989 | 329.94871 | 2.258436   | 6.688E-10 |
| BGIBMGA003149 | 18.261352 | 2.4456365  | 0.0188304 |
| BGIBMGA003217 | 15.922636 | 2.2912743  | 0.0344279 |

| ID            | AveExpr   | Foldchange | P.value   |
|---------------|-----------|------------|-----------|
| BGIBMGA003286 | 55.566123 | 2.2007406  | 0.000635  |
| BGIBMGA003299 | 3.9431361 | 12.455787  | 0.0473812 |
| BGIBMGA003514 | 27.912524 | 3.1810645  | 0.0002306 |
| BGIBMGA003552 | 66.383951 | 2.2887628  | 2.1E-05   |
| BGIBMGA003660 | 17.715664 | 3.0366384  | 0.0057838 |
| BGIBMGA003740 | 17.90252  | 2.3791827  | 0.0191072 |
| BGIBMGA003783 | 1170.8259 | 5.3361635  | 2.61E-174 |
| BGIBMGA003792 | 28.696629 | 2.0855465  | 0.0119879 |
| BGIBMGA003817 | 19.42597  | 3.0935112  | 0.0027437 |
| BGIBMGA003901 | 44.144449 | 4.1420388  | 7.365E-08 |
| BGIBMGA003904 | 13.961135 | 3.6862355  | 0.0056332 |
| BGIBMGA003917 | 67.566952 | 2.0295138  | 0.0001135 |
| BGIBMGA003960 | 30.605641 | 2.3606111  | 0.0171291 |
| BGIBMGA004060 | 17.304631 | 3.9629556  | 0.0011584 |
| BGIBMGA004172 | 32.984068 | 2.1569794  | 0.0040861 |
| BGIBMGA004243 | 261.81233 | 2.3845098  | 1.51E-18  |
| BGIBMGA004340 | 20.285996 | 2.0877572  | 0.0320333 |
| BGIBMGA004353 | 19.791047 | 3.1540942  | 0.0022094 |
| BGIBMGA004413 | 32.259252 | 11.69364   | 1.152E-09 |
| BGIBMGA004414 | 485.18643 | 4.4324475  | 1.286E-33 |
| BGIBMGA004497 | 16.92651  | 2.2756672  | 0.0498127 |
| BGIBMGA004598 | 251.6414  | 2.2963863  | 4.646E-15 |
| BGIBMGA004614 | 3178.59   | 2.1365578  | 8.523E-60 |
| BGIBMGA004773 | 13.445411 | 2.470078   | 0.0473327 |
| BGIBMGA004789 | 131.53058 | 2.2040593  | 5.287E-09 |
| BGIBMGA004790 | 3.1394529 | Inf        | 0.0359899 |
| BGIBMGA004802 | 16.295709 | 3.0696481  | 0.0070701 |
| BGIBMGA004945 | 250.43227 | 2.3956496  | 6.764E-18 |
| BGIBMGA005012 | 55.258585 | 2.1274174  | 0.0001871 |
| BGIBMGA005156 | 5.2607923 | 8.3090345  | 0.0270952 |
| BGIBMGA005190 | 79.732402 | 2.5396893  | 9.478E-06 |
| BGIBMGA005341 | 20.022664 | 2.1827958  | 0.0265623 |
| BGIBMGA005417 | 19.156393 | 3.280855   | 0.0024428 |
| BGIBMGA005619 | 21.191424 | 2.0511666  | 0.0364263 |
| BGIBMGA005633 | 18.062358 | 2.1524382  | 0.0375103 |
| BGIBMGA005642 | 147.49181 | 2.0503636  | 1.22E-08  |
| BGIBMGA005709 | 23.286386 | 2.8278329  | 0.0025005 |
| BGIBMGA005745 | 6.718708  | 4.288979   | 0.0457313 |
| BGIBMGA005763 | 43.243163 | 2.1169377  | 0.0326663 |
| BGIBMGA005780 | 37.54228  | 2.2087884  | 0.0018041 |
| BGIBMGA005785 | 16.453796 | 2.4807166  | 0.0187672 |
| BGIBMGA005795 | 12.082995 | 2.812395   | 0.0349714 |
| BGIBMGA006032 | 11.428763 | 3.4709275  | 0.0205039 |

| ID            | AveExpr   | Foldchange | P.value   |
|---------------|-----------|------------|-----------|
| BGIBMGA006061 | 11.12922  | 3.8437637  | 0.0307136 |
| BGIBMGA006086 | 9.5310446 | 4.4577561  | 0.0138827 |
| BGIBMGA006110 | 11.23391  | 4.1094804  | 0.0270683 |
| BGIBMGA006112 | 26.376295 | 2.1708742  | 0.0092941 |
| BGIBMGA006125 | 24.524822 | 2.2627339  | 0.0392286 |
| BGIBMGA006266 | 33.66882  | 2.1403538  | 0.0177134 |
| BGIBMGA006280 | 34.080494 | 2.3407713  | 0.0016435 |
| BGIBMGA006320 | 19.84739  | 2.0663617  | 0.0377429 |
| BGIBMGA006337 | 4.9992102 | Inf        | 0.004222  |
| BGIBMGA006338 | 18.453813 | 2.467274   | 0.0158018 |
| BGIBMGA006420 | 3.1866047 | Inf        | 0.0353323 |
| BGIBMGA006457 | 24.856987 | 2.7379654  | 0.0019694 |
| BGIBMGA006553 | 16.306096 | 3.9611923  | 0.0015603 |
| BGIBMGA006671 | 137.06839 | 2.2724236  | 1.198E-09 |
| BGIBMGA006854 | 28.845525 | 2.008031   | 0.0204705 |
| BGIBMGA006882 | 107.14814 | 2.2036007  | 3.788E-06 |
| BGIBMGA006949 | 10.867083 | 6.2953565  | 0.0031644 |
| BGIBMGA006950 | 19.996841 | 2.2247882  | 0.0249315 |
| BGIBMGA007029 | 41.471817 | 2.0766921  | 0.0023683 |
| BGIBMGA007101 | 4.128797  | 14.350998  | 0.0348649 |
| BGIBMGA007144 | 321.89846 | 2.7862033  | 3.787E-20 |
| BGIBMGA007316 | 343.75512 | 2.6503645  | 3.422E-28 |
| BGIBMGA007354 | 15.38109  | 2.447888   | 0.0302669 |
| BGIBMGA007403 | 16.608585 | 2.7634821  | 0.0438455 |
| BGIBMGA007421 | 28.022818 | 5.7864086  | 1.144E-06 |
| BGIBMGA007561 | 28.870707 | 2.0518285  | 0.0102621 |
| BGIBMGA007654 | 14.971253 | 2.2883973  | 0.0463816 |
| BGIBMGA007697 | 1009.8395 | 2.0103087  | 2.515E-39 |
| BGIBMGA007713 | 13.763336 | 4.0280357  | 0.0038247 |
| BGIBMGA007883 | 19.800238 | 2.4596672  | 0.0125961 |
| BGIBMGA007991 | 10.829123 | 3.0384193  | 0.0381032 |
| BGIBMGA008050 | 37.465163 | 2.5319212  | 0.0171637 |
| BGIBMGA008067 | 43.625138 | 2.0460171  | 0.0099358 |
| BGIBMGA008068 | 10.296767 | 4.2163058  | 0.0129076 |
| BGIBMGA008080 | 21.51854  | 2.0958928  | 0.0255397 |
| BGIBMGA008102 | 7.6792827 | 3.4325239  | 0.0495641 |
| BGIBMGA008127 | 31.446377 | 2.5688214  | 0.0009596 |
| BGIBMGA008132 | 343.07194 | 4.0299623  | 1.158E-15 |
| BGIBMGA008299 | 7.4384747 | 4.760078   | 0.0264511 |
| BGIBMGA008352 | 4.5869816 | 15.94357   | 0.0235094 |
| BGIBMGA008398 | 9.7834356 | 5.2060326  | 0.0329255 |
| BGIBMGA008401 | 389.43963 | 2.9986189  | 1.297E-37 |
| BGIBMGA008431 | 10.458997 | 5.0887968  | 0.0178672 |

| ID            | AveExpr   | Foldchange | P.value   |
|---------------|-----------|------------|-----------|
| BGIBMGA008562 | 5.6626339 | 17.887427  | 0.0076387 |
| BGIBMGA008628 | 6.3536311 | 6.8072382  | 0.0205632 |
| BGIBMGA008649 | 10.43408  | 3.8398574  | 0.0481368 |
| BGIBMGA008655 | 31.081301 | 2.1477057  | 0.0069779 |
| BGIBMGA008656 | 9.4643146 | 3.6879163  | 0.0214209 |
| BGIBMGA008793 | 13.943948 | 2.7959379  | 0.0223428 |
| BGIBMGA008803 | 44.070919 | 2.149877   | 0.0012201 |
| BGIBMGA008903 | 4295.5033 | 2.0121052  | 2.125E-08 |
| BGIBMGA009037 | 408.88299 | 2.2680138  | 7.211E-19 |
| BGIBMGA009120 | 95.877729 | 2.5207151  | 1.223E-08 |
| BGIBMGA009179 | 88.206731 | 2.1083123  | 4.696E-05 |
| BGIBMGA009215 | 14.971253 | 3.0994156  | 0.0121195 |
| BGIBMGA009327 | 12.702213 | 3.3427837  | 0.0395602 |
| BGIBMGA009455 | 17.587542 | 2.985133   | 0.006983  |
| BGIBMGA009490 | 24.647606 | 2.3379982  | 0.007166  |
| BGIBMGA009551 | 53.937982 | 2.7298543  | 3.067E-05 |
| BGIBMGA009552 | 16.503894 | 2.2948425  | 0.0361509 |
| BGIBMGA009577 | 360.87079 | 2.0299676  | 1.19E-17  |
| BGIBMGA009614 | 67.567241 | 2.7017784  | 1.716E-05 |
| BGIBMGA009642 | 3.7832984 | Inf        | 0.0159035 |
| BGIBMGA009672 | 9.5402358 | 3.102242   | 0.0451311 |
| BGIBMGA009675 | 13.901845 | 3.2481035  | 0.0099005 |
| BGIBMGA009812 | 23.711948 | 2.7041511  | 0.0464241 |
| BGIBMGA009828 | 27.43412  | 3.2110616  | 0.0013743 |
| BGIBMGA009829 | 41.892041 | 2.7790287  | 3.948E-05 |
| BGIBMGA009833 | 25.666915 | 2.8256623  | 0.0011071 |
| BGIBMGA009857 | 68.985711 | 2.387402   | 4.75E-06  |
| BGIBMGA010104 | 115.25509 | 2.1943263  | 5.653E-08 |
| BGIBMGA010167 | 14.332457 | 2.2619664  | 0.0453675 |
| BGIBMGA010287 | 64.102774 | 2.233964   | 3.516E-05 |
| BGIBMGA010400 | 9.0141254 | 4.1051287  | 0.0288298 |
| BGIBMGA010403 | 345.02974 | 2.0424951  | 1.003E-17 |
| BGIBMGA010461 | 116.79727 | 2.1582572  | 7.18E-05  |
| BGIBMGA010500 | 18.521739 | 2.6220894  | 0.0122403 |
| BGIBMGA010568 | 27.622172 | 2.5341105  | 0.0021882 |
| BGIBMGA010701 | 58.138847 | 3.1727089  | 8.315E-07 |
| BGIBMGA010769 | 5.5395609 | 6.4181915  | 0.0393591 |
| BGIBMGA010825 | 63.524463 | 4.0343634  | 3.473E-10 |
| BGIBMGA010983 | 10.66304  | 4.8201759  | 0.0060585 |
| BGIBMGA011106 | 47.263682 | 3.0301363  | 0.0146287 |
| BGIBMGA011170 | 143.44095 | 2.8137897  | 1.026E-10 |
| BGIBMGA011216 | 17.278253 | 2.2375599  | 0.0343699 |
| BGIBMGA011228 | 37.104869 | 2.403767   | 0.0005592 |

| ID            | AveExpr   | Foldchange | P.value   |
|---------------|-----------|------------|-----------|
| BGIBMGA011313 | 20.640132 | 3.6610588  | 0.0020341 |
| BGIBMGA011346 | 33.695839 | 2.8107175  | 0.0002646 |
| BGIBMGA011348 | 16.977515 | 3.7067099  | 0.0022319 |
| BGIBMGA011569 | 46.80109  | 2.0075205  | 0.0018726 |
| BGIBMGA011573 | 33.699981 | 2.0691699  | 0.0067453 |
| BGIBMGA011580 | 8.5692741 | 4.6946266  | 0.0189898 |
| BGIBMGA011582 | 15.340183 | 2.4724462  | 0.0257333 |
| BGIBMGA011679 | 7.8690857 | 3.5836655  | 0.0488131 |
| BGIBMGA011787 | 67.184688 | 3.397165   | 2.792E-09 |
| BGIBMGA011811 | 22.264685 | 2.8104998  | 0.0054007 |
| BGIBMGA011831 | 29.358857 | 2.0365239  | 0.0106143 |
| BGIBMGA011832 | 41.996732 | 2.0833102  | 0.002023  |
| BGIBMGA011951 | 8.688205  | 5.4034601  | 0.0086343 |
| BGIBMGA011981 | 6.841781  | 7.1103119  | 0.0145268 |
| BGIBMGA012043 | 16.058754 | 2.6019731  | 0.0290434 |
| BGIBMGA012216 | 16.774667 | 3.0563123  | 0.00788   |
| BGIBMGA012236 | 60.897787 | 2.6041411  | 9.421E-06 |
| BGIBMGA012326 | 13.209652 | 3.8989347  | 0.0050371 |
| BGIBMGA012338 | 533.93256 | 2.1078347  | 1.113E-23 |
| BGIBMGA012362 | 98.337127 | 2.6878392  | 1.213E-09 |
| BGIBMGA012363 | 35.220485 | 3.1787383  | 4.724E-05 |
| BGIBMGA012368 | 12.380146 | 3.5144179  | 0.0150078 |
| BGIBMGA012456 | 372.35266 | 2.1744302  | 2.431E-21 |
| BGIBMGA012488 | 163.6084  | 4.7450836  | 1.346E-25 |
| BGIBMGA012521 | 74.90727  | 2.0075331  | 0.0006485 |
| BGIBMGA012646 | 36.676009 | 2.2630063  | 0.001919  |
| BGIBMGA012654 | 6.4479347 | 11.205964  | 0.0096803 |
| BGIBMGA012676 | 68.606394 | 2.1395866  | 4.923E-05 |
| BGIBMGA012736 | 4.7767846 | 15.08916   | 0.0407196 |
| BGIBMGA012783 | 23.663311 | 2.0277075  | 0.0420892 |
| BGIBMGA012836 | 23.510562 | 3.2111583  | 0.0009782 |
| BGIBMGA012973 | 10.538771 | 3.0662174  | 0.0323204 |
| BGIBMGA013101 | 13.958188 | 2.5583958  | 0.0328529 |
| BGIBMGA013111 | 1174.6034 | 2.0464852  | 4.259E-28 |
| BGIBMGA013130 | 8.0155901 | 4.9851403  | 0.0152735 |
| BGIBMGA013211 | 8.6635777 | 3.52396    | 0.0438892 |
| BGIBMGA013220 | 38.789353 | 2.2112881  | 0.0013578 |
| BGIBMGA013274 | 13.85764  | 2.9289803  | 0.0228564 |
| BGIBMGA013379 | 55.248487 | 3.2101823  | 2.826E-07 |
| BGIBMGA013455 | 11.241351 | 2.8335417  | 0.0397613 |
| BGIBMGA013479 | 12.332994 | 2.9661931  | 0.0206244 |
| BGIBMGA013662 | 38.014439 | 2.0844656  | 0.0041005 |
| BGIBMGA013748 | 16.901593 | 4.0212493  | 0.0009482 |

| ID            | AveExpr   | Foldchange | P.value   |
|---------------|-----------|------------|-----------|
| BGIBMGA013839 | 466.47856 | 2.0927054  | 3.48E-23  |
| BGIBMGA013844 | 6.1742152 | 21.460525  | 0.0094593 |
| BGIBMGA013849 | 24.767733 | 2.0701293  | 0.0176752 |
| BGIBMGA013865 | 6.4387435 | 10.655379  | 0.0096332 |
| BGIBMGA013931 | 77.785429 | 2.4204653  | 0.0032954 |
| BGIBMGA013932 | 3.944332  | 11.985486  | 0.04721   |
| BGIBMGA013955 | 6.6899386 | 5.4063916  | 0.0278191 |
| BGIBMGA013966 | 280.32729 | 2.6653735  | 1.248E-13 |
| BGIBMGA013991 | 22.175719 | 2.3148054  | 0.0140665 |
| BGIBMGA014055 | 19.433966 | 2.2189355  | 0.023846  |
| BGIBMGA014204 | 14.056634 | 3.0282876  | 0.0163752 |
| BGIBMGA014239 | 15.751216 | 2.4465082  | 0.0275245 |
| BGIBMGA014263 | 4.9716367 | 7.5535581  | 0.0369587 |
| BGIBMGA014309 | 16.687163 | 2.9777182  | 0.0198446 |
| BGIBMGA014329 | 13.373632 | 3.8953462  | 0.0120007 |
| BGIBMGA014364 | 17.229906 | 2.3598257  | 0.0275336 |
| BGIBMGA014372 | 32.956494 | 2.3326317  | 0.0017242 |
| BGIBMGA014404 | 208.18133 | 2.4235775  | 1.051E-15 |
| BGIBMGA014407 | 29.78413  | 2.2781621  | 0.0089768 |
| BGIBMGA014465 | 14.718862 | 2.367527   | 0.0436996 |
| BGIBMGA014478 | 39.525751 | 2.1857741  | 0.0012953 |
| BGIBMGA014574 | 12.318754 | 4.4920383  | 0.0105785 |
| BGIBMGA014575 | 7.9254287 | 24.082688  | 0.0007435 |
| BGIBMGA014617 | 29.656008 | 2.6238844  | 0.0012387 |
| BGIBMGA014621 | 4.9808278 | 7.7142843  | 0.0369852 |

Down

| ID            | AveExpr   | Foldchange | P.value   |
|---------------|-----------|------------|-----------|
| BGIBMGA000310 | 32.915235 | 0.4410241  | 0.0013744 |
| BGIBMGA000315 | 5.9425984 | 0.3182778  | 0.0042727 |
| BGIBMGA000444 | 3929.536  | 0.3669869  | 6.92E-244 |
| BGIBMGA000520 | 15.078601 | 0.3339764  | 1.03E-05  |
| BGIBMGA000659 | 1.6999196 | 0.1785746  | 0.0194449 |
| BGIBMGA000673 | 56.097837 | 0.441035   | 5.473E-06 |
| BGIBMGA000818 | 8.0363642 | 0.4504763  | 0.0353728 |
| BGIBMGA000864 | 938.72331 | 0.4732522  | 5.836E-70 |
| BGIBMGA001092 | 29.388822 | 0.3104723  | 1.333E-11 |
| BGIBMGA001146 | 23.473797 | 0.1815418  | 7.555E-25 |
| BGIBMGA001198 | 1.4579157 | 0.1859297  | 0.0180389 |
| BGIBMGA001575 | 203.49619 | 0.3752509  | 2.454E-41 |
| BGIBMGA001576 | 536.1043  | 0.3663725  | 1.351E-92 |
| BGIBMGA001611 | 12.398528 | 0.2443716  | 1.441E-08 |
| BGIBMGA002163 | 100.11773 | 0.4402201  | 1.277E-06 |



| ID            | AveExpr   | Foldchange | P.value   |
|---------------|-----------|------------|-----------|
| BGIBMGA002192 | 11.101646 | 0.4452351  | 0.0100363 |
| BGIBMGA002436 | 53.866203 | 0.3399354  | 0.0020786 |
| BGIBMGA002437 | 42.753263 | 0.3165279  | 2.107E-15 |
| BGIBMGA002474 | 1.785032  | 0.112778   | 0.000193  |
| BGIBMGA002475 | 7.8966592 | 0.2613655  | 2.551E-05 |
| BGIBMGA002548 | 0         | 0          | 0.0406831 |
| BGIBMGA002974 | 323.05331 | 0.4928764  | 2.119E-28 |
| BGIBMGA003045 | 553.31191 | 0.458165   | 1.104E-53 |
| BGIBMGA003122 | 16.012798 | 0.4038174  | 0.0004381 |
| BGIBMGA003167 | 26.47299  | 0.3364483  | 2.343E-08 |
| BGIBMGA003170 | 31.565308 | 0.3069728  | 1.251E-12 |
| BGIBMGA003171 | 203.31978 | 0.1979763  | 2.59E-115 |
| BGIBMGA003203 | 139.2615  | 0.4249233  | 5.129E-16 |
| BGIBMGA003249 | 13.060202 | 0.4758562  | 0.0402581 |
| BGIBMGA003497 | 1507.7193 | 0.4806326  | 3.73E-34  |
| BGIBMGA003572 | 0.3363074 | 0.0542803  | 0.0066042 |
| BGIBMGA003869 | 22.293454 | 0.4664666  | 0.0007425 |
| BGIBMGA003898 | 5.2320229 | 0.3896385  | 0.0369535 |
| BGIBMGA004037 | 349.0331  | 0.4885664  | 3.324E-31 |
| BGIBMGA004797 | 0         | 0          | 0.0238553 |
| BGIBMGA004998 | 6.288097  | 0.364085   | 0.0396446 |
| BGIBMGA005013 | 49.105698 | 0.3654551  | 7.423E-13 |
| BGIBMGA005481 | 11.373615 | 0.451095   | 0.0111741 |
| BGIBMGA005710 | 3.0923011 | 0.301556   | 0.0349469 |
| BGIBMGA005723 | 379.4768  | 0.4534904  | 9.831E-42 |
| BGIBMGA005814 | 2.0270358 | 0.1419166  | 0.0005471 |
| BGIBMGA005891 | 13.578871 | 0.3744896  | 0.0002525 |
| BGIBMGA006015 | 0         | 0          | 0.0015769 |
| BGIBMGA006111 | 2.09257   | 0.260195   | 0.0419818 |
| BGIBMGA006194 | 1361.73   | 0.4852916  | 2.072E-80 |
| BGIBMGA006318 | 11.752933 | 0.3978979  | 0.0060587 |
| BGIBMGA006745 | 1.0089223 | 0.1468529  | 0.0471979 |
| BGIBMGA006875 | 284.84521 | 0.2995999  | 1.614E-63 |
| BGIBMGA006886 | 383.82397 | 0.4079719  | 6.361E-21 |
| BGIBMGA006978 | 15.140282 | 0.485351   | 0.0070896 |
| BGIBMGA007297 | 1200.8074 | 0.4925583  | 1.17E-71  |
| BGIBMGA007651 | 7.4384747 | 0.4322084  | 0.0286377 |
| BGIBMGA007740 | 1295.5173 | 0.4815989  | 4.736E-80 |
| BGIBMGA007907 | 4.9520584 | 0.3321572  | 0.0129552 |
| BGIBMGA008361 | 1.7562625 | 0.2419705  | 0.0493489 |
| BGIBMGA008374 | 5.476973  | 0.3492423  | 0.0122896 |
| BGIBMGA008502 | 9.2694626 | 0.4869966  | 0.0448013 |
| BGIBMGA008856 | 48.487676 | 0.4704161  | 6.558E-07 |

| ID            | AveExpr   | Foldchange | P.value   |
|---------------|-----------|------------|-----------|
| BGIBMGA009184 | 21.078738 | 0.4717672  | 0.0014323 |
| BGIBMGA009424 | 8.2783681 | 0.41013    | 0.0359502 |
| BGIBMGA009498 | 67.089743 | 0.4884122  | 3.242E-08 |
| BGIBMGA009572 | 1242.5303 | 0.4939659  | 4.526E-73 |
| BGIBMGA010029 | 1678.8701 | 0.4987019  | 1.522E-82 |
| BGIBMGA010652 | 17.542782 | 0.3971019  | 0.000114  |
| BGIBMGA011141 | 0         | 0          | 0.0085731 |
| BGIBMGA011167 | 0         | 0          | 0.0165231 |
| BGIBMGA011304 | 43.896552 | 0.3012532  | 2.095E-17 |
| BGIBMGA011378 | 16.72632  | 0.4690234  | 0.0029889 |
| BGIBMGA011441 | 100.81295 | 0.3137176  | 8.118E-33 |
| BGIBMGA011525 | 1419.753  | 0.4835063  | 4.263E-75 |
| BGIBMGA011530 | 22.163582 | 0.421105   | 7.73E-05  |
| BGIBMGA011781 | 0         | 0          | 0.0473304 |
| BGIBMGA011825 | 0         | 0          | 0.0475932 |
| BGIBMGA011876 | 1.0181135 | 0.1576159  | 0.0275733 |
| BGIBMGA011942 | 6.9986725 | 0.1889937  | 6.835E-06 |
| BGIBMGA012345 | 11.509733 | 0.332569   | 0.0001365 |
| BGIBMGA012346 | 69.554831 | 0.3817625  | 9.161E-13 |
| BGIBMGA012511 | 16.300758 | 0.1681667  | 1.097E-19 |
| BGIBMGA012883 | 40.140827 | 0.4000011  | 9.791E-07 |
| BGIBMGA013007 | 33.292801 | 0.375466   | 1.332E-08 |
| BGIBMGA013008 | 3.6931369 | 0.2459368  | 0.0023602 |
| BGIBMGA013329 | 12.035843 | 0.4990553  | 0.0273541 |
| BGIBMGA013372 | 3.5700639 | 0.3159489  | 0.0277468 |
| BGIBMGA013759 | 407.03785 | 0.4787504  | 1.672E-37 |
| BGIBMGA014528 | 8.6226708 | 0.4352372  | 0.0272507 |

**Table S5.** Genes regulated by both BmMlx and BmMondo in BmNs cells.

Down-regulated

| ID            |
|---------------|
| BGIBMGA000315 |
| BGIBMGA000444 |
| BGIBMGA000520 |
| BGIBMGA000659 |
| BGIBMGA000864 |
| BGIBMGA001092 |
| BGIBMGA001146 |
| BGIBMGA001198 |
| BGIBMGA001575 |
| BGIBMGA001576 |
| BGIBMGA001611 |
| BGIBMGA002436 |

| ID            |
|---------------|
| BGIBMGA002437 |
| BGIBMGA002474 |
| BGIBMGA002475 |
| BGIBMGA002548 |
| BGIBMGA003045 |
| BGIBMGA003122 |
| BGIBMGA003167 |
| BGIBMGA003170 |
| BGIBMGA003171 |
| BGIBMGA003203 |
| BGIBMGA003249 |
| BGIBMGA003497 |
| BGIBMGA003572 |
| BGIBMGA004037 |
| BGIBMGA005013 |
| BGIBMGA005891 |
| BGIBMGA006318 |
| BGIBMGA006875 |
| BGIBMGA006886 |
| BGIBMGA007297 |
| BGIBMGA007740 |
| BGIBMGA008361 |
| BGIBMGA008374 |
| BGIBMGA008856 |
| BGIBMGA009184 |
| BGIBMGA010652 |
| BGIBMGA011304 |
| BGIBMGA011441 |
| BGIBMGA011525 |
| BGIBMGA011876 |
| BGIBMGA011942 |
| BGIBMGA012345 |
| BGIBMGA012346 |
| BGIBMGA012511 |
| BGIBMGA012883 |
| BGIBMGA013007 |
| BGIBMGA013008 |

#### Up-regulated

| ID            |
|---------------|
| BGIBMGA000116 |
| BGIBMGA000117 |
| BGIBMGA000223 |

| ID            |
|---------------|
| BGIBMGA000476 |
| BGIBMGA000561 |
| BGIBMGA000590 |
| BGIBMGA000736 |
| BGIBMGA001367 |
| BGIBMGA001376 |
| BGIBMGA001384 |
| BGIBMGA001613 |
| BGIBMGA001836 |
| BGIBMGA002049 |
| BGIBMGA002077 |
| BGIBMGA002216 |
| BGIBMGA002367 |
| BGIBMGA002505 |
| BGIBMGA002584 |
| BGIBMGA002986 |
| BGIBMGA002989 |
| BGIBMGA003149 |
| BGIBMGA003217 |
| BGIBMGA003514 |
| BGIBMGA003660 |
| BGIBMGA003740 |
| BGIBMGA003783 |
| BGIBMGA003817 |
| BGIBMGA003901 |
| BGIBMGA003917 |
| BGIBMGA003960 |
| BGIBMGA004060 |
| BGIBMGA004172 |
| BGIBMGA004243 |
| BGIBMGA004353 |
| BGIBMGA004413 |
| BGIBMGA004414 |
| BGIBMGA004497 |
| BGIBMGA004598 |
| BGIBMGA004614 |
| BGIBMGA004945 |
| BGIBMGA005012 |
| BGIBMGA005190 |
| BGIBMGA005780 |
| BGIBMGA005785 |
| BGIBMGA006032 |
| BGIBMGA006112 |

| ID            |
|---------------|
| BGIBMGA006125 |
| BGIBMGA006280 |
| BGIBMGA006337 |
| BGIBMGA006338 |
| BGIBMGA006457 |
| BGIBMGA006553 |
| BGIBMGA006671 |
| BGIBMGA006882 |
| BGIBMGA006949 |
| BGIBMGA007144 |
| BGIBMGA007316 |
| BGIBMGA007354 |
| BGIBMGA007421 |
| BGIBMGA007697 |
| BGIBMGA008050 |
| BGIBMGA008068 |
| BGIBMGA008127 |
| BGIBMGA008132 |
| BGIBMGA008398 |
| BGIBMGA008401 |
| BGIBMGA008431 |
| BGIBMGA008655 |
| BGIBMGA008656 |
| BGIBMGA008803 |
| BGIBMGA008903 |
| BGIBMGA009037 |
| BGIBMGA009120 |
| BGIBMGA009490 |
| BGIBMGA009551 |
| BGIBMGA009614 |
| BGIBMGA009675 |
| BGIBMGA009812 |
| BGIBMGA009828 |
| BGIBMGA009833 |
| BGIBMGA009857 |
| BGIBMGA010104 |
| BGIBMGA010403 |
| BGIBMGA010461 |
| BGIBMGA010701 |
| BGIBMGA010825 |
| BGIBMGA011170 |
| BGIBMGA011346 |
| BGIBMGA011573 |

| ID            |
|---------------|
| BGIBMGA011787 |
| BGIBMGA011811 |
| BGIBMGA011832 |
| BGIBMGA012236 |
| BGIBMGA012362 |
| BGIBMGA012363 |
| BGIBMGA012488 |
| BGIBMGA012646 |
| BGIBMGA012676 |
| BGIBMGA012836 |
| BGIBMGA013111 |
| BGIBMGA013130 |
| BGIBMGA013379 |
| BGIBMGA013748 |
| BGIBMGA013844 |
| BGIBMGA013849 |
| BGIBMGA013865 |
| BGIBMGA013931 |
| BGIBMGA013966 |
| BGIBMGA013991 |
| BGIBMGA014204 |
| BGIBMGA014329 |
| BGIBMGA014372 |
| BGIBMGA014404 |
| BGIBMGA014407 |
| BGIBMGA014465 |
| BGIBMGA014617 |

**Table S6.** Primers for q-PCR.

| Primers name | Sequence (5'→ 3')         |
|--------------|---------------------------|
| β-actin-F    | CTCCCTCGAGAAGTCCTACGAACT  |
| β-actin-R    | GGATGCCGCACGATTCCATACF    |
| Mlx-F        | CTCACACACAGGCAGAGCAG      |
| Mlx-R        | CTGAAGGACTGCAGCTTTGC      |
| Mondo-F      | GGCTATACACGGTACGAGTAAC    |
| Mondo-R      | GGGGGGTATAGCTGCACTATATTTA |
| Tret-F       | GAAACCAACGCTCTCAGCG       |
| Tret-R       | CTGATCTGACGTAGTTGTTG      |
| PFK-F        | CATAGCTGGAATGGTTGGTTC     |
| PFK-R        | GCCAAATAACCACAGTTGC       |
| PK-F         | CGAACAAGGCGTTGATATG       |
| PK-R         | CGGATTCAGCTATAATCTCG      |
| Cabut-F      | GACACTTAAATTTAAAATGAAC    |

| Primers name | Sequence (5'→ 3')        |
|--------------|--------------------------|
| Cabut-R      | GTGACGGTACGCGAGCTTCTTC   |
| ACC-F        | GTTCTCGTTGGACGACAAC      |
| ACC- R       | GACTCTGCATAAACTTCTCC     |
| FAS-F        | GACAACGTCACCATATCCGGTCC  |
| FAS-R        | CTCAGCTTGGCCAGCTCTGATC   |
| GS2-F        | GATAACGGTATCATTGAAATCG   |
| GS2-R        | CAGAGCGAGGTATTCTGATAC    |
| Cycle-F      | GACGCAGGACTGTGCGAACCCG   |
| Cycle-R      | GTTTTCAGGAACGTAGTGATTG   |
| FAMet5-F     | TTGTATACGGACATAATAGCTGCC |
| FAMet5-R     | CCTTTCTACGGATTTTGTGTTCAC |

**Table S7.** Primers for cloning.

| Primers name                    | Sequence (5'→ 3')                               |
|---------------------------------|-------------------------------------------------|
| Mlx-F                           | ATGTATCCTCGTTGTGGCAG                            |
| Mlx-R                           | TTAAAGTGTGTAGTTCTGATC                           |
| Mondo-F                         | ATGAACCAGGTAGAAAAAAG                            |
| Mondo-R                         | TTACGAGGGTTCTGTCTTG                             |
| shGFP-F (Interfered in cells)   | TCGAGCGAAGGTTATGTACAGGAAAGT <u>GTGTGCTGTCC</u>  |
| shGFP-R (Interfered in cells)   | GATCTGAAGGTTATGTACAGGAAAGT <u>GGACAGCACAC</u>   |
| shMlx-F (Interfered in cells)   | TCGAGCGAAGAGATGCAATTAAGAAAGG <u>GTGTGCTGTCC</u> |
| shMlx-R (Interfered in cells)   | GATCTGAAGAGATGCAATTAAGAAAGG <u>GGACAGCACAC</u>  |
| shMondo-F (Interfered in cells) | TCGAGCGGATCGACTAGCACAAGTAGC <u>GTGTGCTGTCC</u>  |
| shMondo-R (Interfered in cells) | GATCTGGATCGACTAGCACAAGTAGC <u>GGACAGCACAC</u>   |

The underline means intron.

**Table S8.** Primers for ChIP and EMSA probes.

| Primers name            | Sequence (5'→ 3')                      |
|-------------------------|----------------------------------------|
| ACC-F (EMSA probe)      | Biotin-AAGTACCCGCGTGATGATCGTACGATCGCAC |
| ACC-F (EMSA probe)      | AAGTACCCGCGTGATGATCGTACGATCGCAC        |
| ACC-R (EMSA probe)      | GTGCGATCGTACGATCATCACGCGGGTACTT        |
| ACC-F1 (Mutation probe) | AAGTACCAAAAAAATGATAAAAAAATCGCAC        |
| ACC-R1 (Mutation probe) | GTGCGATTTTTTTATCATTTTTTTGGTACTT        |
| Tret-F (ChIP)           | CATCTACATTTTCAGGTGAGGTG                |
| Tret-R (ChIP)           | GGAAGGTTGGCAGTGTCGGC                   |
| PFK-F (ChIP)            | CCCTACTTAAGCTAAAAGCC                   |
| PFK-R (ChIP)            | GATCTTCTCAGTGGGTCGCG                   |

| Primers name   | Sequence (5'→ 3')     |
|----------------|-----------------------|
| ACC-F (ChIP)   | GACGTACAAAAACCCAACC   |
| ACC-R (ChIP)   | CTGTTGCAAACCTCATTGC   |
| FAS-F (ChIP)   | GTAGGTATCTAACAGTGTAAG |
| FAS-R (ChIP)   | GCACGATCATCGTTTTCGCCG |
| GS2-F (ChIP)   | CACCGTGGAAGTCAATTGTG  |
| GS2-R (ChIP)   | GTCAACTCGAGTAACATCAG  |
| Cabut-F (ChIP) | GCCTACTGAGTTTCTGGCGG  |
| Cabut-R (ChIP) | CTAGAGAGACCATATCAGCG  |

**Table S9.** Primers for construction of transgenic vector.

| Primers name | Sequence (5'→ 3')                            |
|--------------|----------------------------------------------|
| Mlx-OE-F     | GGATCCATGAACCAGGTAGAA AAAAG                  |
| Mlx-OE-R     | GCGGCCGCTTACGAG GGTTCGTCTTGACGG              |
| Mondo-OE-F   | GGATCCATGAACCAGGTAGAAAAAAG                   |
| Mondo-OE-R   | GCGGCCGTTACGAGGGTTCTGTCTTG                   |
| Mlx-KO-F     | GGATCCGGCTATGATTCACTCCAAGAC                  |
| (Forward)    |                                              |
| Mlx-KO-R     | GAATTCCTGAAACAGAACAAAGTCATTTCGTCAGATAAC      |
| (Forward)    | GGCCCACCGGCCGAGAGGCGAAGTGCATAGTCCAGAAT       |
|              | CGATGAGCTCACGCATTATACGAAGAGCGACAAC           |
| Mlx-KO-F     | GAATTCGCATTATACGAAGAGCGACAAC                 |
| (Reverse)    |                                              |
| Mlx-KO-R     | CGGCCGCGGCTATGATTCACTCCAAGAC                 |
| (Reverse)    |                                              |
| Mondo-KO-F   | GGATCCCAACTTTCCATCGAAGTTTCC                  |
| (Forward)    |                                              |
| Mondo-KO-R   | GAATTCCTGAAACAGAACAAAGTCATTTCGTCAGATAACGGTCG |
| (Forward)    | ATAACGGCCCACCGGCCGAGAGGCGAAGTGCATAGTCCAGAAT  |
|              | CGATGAGCTCACATGAAGTCTGCTAAACTTGCCC           |
| Mondo-KO-F   | GAATTCATGAAGTCTGCTAAACTTGCC                  |
| (Reverse)    |                                              |
| Mondo-KO-R   | GCGGCCGC CAACTTTCCATCGAAGTTTC                |
| (Reverse)    |                                              |
